# Supplementary material for: Effect of water on the oxidation of CO by a Criegee intermediate
Source: Royal Society of Chemistry journal article supplement (doi:10.1039/d0cp02682d), 2020-01-01
Supplement: d0cp02682d1.pdf [file d0cp02682d1.pdf]

**Supplementary Information for**  
**Effect of water on the oxidation of CO by**  
**Criegee intermediate.**

Amit Kumar, Subhasish Mallick, and Pradeep Kumar\*

*Department of Chemistry, Malaviya National Institute of Technology Jaipur, Jaipur,*  
*302017, India*

E-mail: [pradeep.chy@mnit.ac.in](mailto:pradeep.chy@mnit.ac.in)

## Sl. No.

## Contents

1. **Table S1:** Optimized geometries in Cartesian coordinates and all normal mode frequencies calculated at the M062X/aug-cc-pVTZ level of theory.
2. **Table S2:** Bimolecular rate constant  $k_b$  in ( $\text{cm}^3 \text{ molecule}^{-1} \text{ sec}^{-1}$ ) for  $\text{H}_2\text{O}$  catalyzed channel corresponds to TS1 within the temperature range of 213-1400 K.
3. **Table S3:** Bimolecular rate constant  $k_b$  in ( $\text{cm}^3 \text{ molecule}^{-1} \text{ sec}^{-1}$ ) for  $\text{H}_2\text{O}$  catalyzed channel corresponds to TS2 within the temperature range of 213-1400 K.
4. **Table S4:** Bimolecular rate constant  $k_b$  in ( $\text{cm}^3 \text{ molecule}^{-1} \text{ sec}^{-1}$ ) for  $\text{H}_2\text{O}$  catalyzed channel corresponds to TS3 within the temperature range of 213-1400 K.
5. **Table S5:** The total bimolecular rate constant  $k_b$  in ( $\text{cm}^3 \text{ molecule}^{-1} \text{ sec}^{-1}$ ) for  $\text{H}_2\text{O}$  catalyzed channel within the temperature range of 213-1400 K.
6. **Table S6:** Relative energies ( $\Delta E$ ) including ZPE in  $\text{kcal mol}^{-1}$  for all the species with respect to the isolated reactants at the M06-2X/aug-cc-pVTZ//CCSD(T)/CBS level of theory in the presence of  $\text{H}_2\text{O}$ .
7. **Table S7:** Concentration of different bimolecular species in in molecules  $\text{cm}^{-3}$ , calculated using the  $k_{eq1}$  values of path A, B, and C for  $\text{H}_2\text{O}$  catalyzed channel.
8. **Table S8:** Concentration of different bimolecular species in in molecules  $\text{cm}^{-3}$ , calculated using the  $k_{eq1}$  values of path A, B, and C for  $(\text{H}_2\text{O})_2$  catalyzed channel.
9. **Table S9:** Termolecular rate constant  $k_t$  in ( $\text{cm}^6 \text{ molecule}^{-2} \text{ sec}^{-1}$ ) for  $\text{H}_2\text{O}$  catalyzed channel corresponds to TS1 within the temperature range of 213-1400K.
10. **Table S10:** Termolecular rate constant  $k_t$  in ( $\text{cm}^6 \text{ molecule}^{-2} \text{ sec}^{-1}$ ) for  $\text{H}_2\text{O}$  catalyzed channel corresponds to TS2 within the temperature range of 213-1400K.
11. **Table S11:** Termolecular rate constant  $k_t$  in ( $\text{cm}^6 \text{ molecule}^{-2} \text{ sec}^{-1}$ ) for  $\text{H}_2\text{O}$  catalyzed channel corresponds to TS3 within the temperature range of 213-1400K.
12. **Figure S1:** Gibbs free energy profile for  $\text{CH}_2\text{OO} + \text{CO}$  reaction in presence of  $\text{H}_2\text{O}$  calculated at M06-2X/aug-cc-pVTZ level of theory.
13. **Table S12:** Bimolecular rate constant  $k_b$  in ( $\text{cm}^3 \text{ molecule}^{-1} \text{ sec}^{-1}$ ) for  $(\text{H}_2\text{O})_2$  catalyzed channel corresponds to TS1 within the temperature range of 213-1400 K.
14. **Table S13:** Bimolecular rate constant  $k_b$  in ( $\text{cm}^3 \text{ molecule}^{-1} \text{ sec}^{-1}$ )  $(\text{H}_2\text{O})_2$  catalyzed channel corresponds to TS2 within the temperature range of 213-1400 K.
15. **Table S14:** Bimolecular rate constant  $k_b$  in ( $\text{cm}^3 \text{ molecule}^{-1} \text{ sec}^{-1}$ ) for  $(\text{H}_2\text{O})_2$  catalyzed channel corresponds to TS3 within the temperature range of 213-1400 K.
16. **Table S15:** The total bimolecular rate constant  $k_b$  in ( $\text{cm}^3 \text{ molecule}^{-1} \text{ sec}^{-1}$ ) for  $(\text{H}_2\text{O})_2$  catalyzed channel within the temperature range of 213-1400 K.

**Sl. No.****Contents**

17. **Table S16:**Relative energies ( $\Delta E$ ) including ZPE in kcal mol<sup>-1</sup> for all the species with respect to the isolated reactants at the M06-2X/aug-cc-pVTZ//CCSD(T)/CBS level of theory in the presence of (H<sub>2</sub>O)
18. **Table S17:** Termolecular rate constant  $k_t$  in (cm<sup>6</sup> molecule<sup>-2</sup> sec<sup>-1</sup>) for (H<sub>2</sub>O)<sub>2</sub> catalyzed channel corresponds to TS1 within the temperature range of 213-1400K.
19. **Table S18:** Termolecular rate constant  $k_t$  in (cm<sup>6</sup> molecule<sup>-2</sup> sec<sup>-1</sup>) for (H<sub>2</sub>O)<sub>2</sub> catalyzed channel corresponds to TS2 within the temperature range of 213-1400K.
20. **Table S19:** Termolecular rate constant  $k_t$  in (cm<sup>6</sup> molecule<sup>-2</sup> sec<sup>-1</sup>) for (H<sub>2</sub>O)<sub>2</sub> catalyzed channel corresponds to TS3 within the temperature range of 213-1400K.
21. **Table S20:** Concentrations of H<sub>2</sub>O and (H<sub>2</sub>O)<sub>2</sub> in molecules cm<sup>-3</sup>,  $k_t$  in cm<sup>6</sup> molecule<sup>-2</sup> sec<sup>-1</sup> and  $k_{eff}$  in cm<sup>3</sup> molecule<sup>1</sup> sec<sup>1</sup> at higher altitude.
22. **Table S21:** Absolute energies in Hartree for the uncatalyzed channel optimized at M06-2X/aug-cc-pVTZ level of theory.

Table S1: Optimized geometries in Cartesian coordinates and normal mode frequencies of all species calculate at M062X/aug-cc-pVTZ level of theory

| compound                         | cartesian coordinate(Å) |           |           | frequency(cm <sup>-1</sup> ) |           |           |           |
|----------------------------------|-------------------------|-----------|-----------|------------------------------|-----------|-----------|-----------|
| CH <sub>2</sub> OO               | O                       | -1.167369 | 0.192586  | 0.000105                     | 538.3305  | 697.3217  | 929.575   |
|                                  | O                       | 0.006904  | -0.459273 | -0.000058                    | 1022.7741 | 1260.7685 | 1432.8735 |
|                                  | C                       | 1.054173  | 0.202791  | -0.000096                    | 1629.6696 | 3139.9976 | 3290.8134 |
|                                  | H                       | 0.986317  | 1.284825  | 0.000206                     |           |           |           |
|                                  | H                       | 1.972367  | -0.368079 | -0.000004                    |           |           |           |
| CO                               | C                       | 0.00      | 0.00      | -0.640774                    | 2272.4229 |           |           |
|                                  | O                       | 0.00      | 0.00      | 0.480581                     |           |           |           |
| WM                               | O                       | 0.00      | 0.00      | 0.116356                     | 1619.135  | 3870.5222 | 3973.6259 |
|                                  | H                       | 0.00      | 0.762511  | -0.465425                    |           |           |           |
|                                  | H                       | 0.00      | -0.762511 | -0.465425                    |           |           |           |
| CI-CO                            | O                       | -0.721097 | 1.208374  | 0.198852                     | 75.6097   | 111.6637  | 136.8406  |
|                                  | O                       | -1.210084 | 0.107856  | -0.404976                    | 168.4595  | 190.9485  | 541.7498  |
|                                  | C                       | -1.166233 | -0.966006 | 0.210963                     | 699.3429  | 930.6858  | 1039.4746 |
|                                  | H                       | -0.76154  | -0.977327 | 1.21611                      | 1262.0199 | 1437.1265 | 1636.1261 |
|                                  | H                       | -1.553608 | -1.827074 | -0.316513                    | 2226.3558 | 3144.1455 | 3292.5125 |
|                                  | O                       | 1.643938  | -0.603723 | -0.058612                    |           |           |           |
|                                  | C                       | 1.935083  | 0.483396  | -0.007914                    |           |           |           |
| TS <sub>unecat</sub>             | O                       | -0.185313 | 1.182386  | 0.188343                     | -449.1088 | 273.4263  | 341.9915  |
|                                  | O                       | -1.057837 | 0.257581  | -0.349913                    | 454.6682  | 576.2288  | 695.8124  |
|                                  | C                       | -0.911602 | -0.863959 | 0.216346                     | 778.9603  | 981.9863  | 1099.8722 |
|                                  | H                       | -0.653526 | -0.907604 | 1.265532                     | 1242.6743 | 1414.2409 | 1575.3033 |
|                                  | H                       | -1.331049 | -1.706682 | -0.318346                    | 1835.2116 | 3155.3252 | 3290.8577 |
|                                  | O                       | 1.137298  | -0.757176 | -0.11308                     |           |           |           |
|                                  | C                       | 1.383501  | 0.389285  | -0.00801                     |           |           |           |
| PC <sub>unecat</sub>             | O                       | -0.824533 | 1.224417  | 0.000262                     | 51.5768   | 104.7025  | 138.576   |
|                                  | O                       | 1.328516  | -0.7387   | 0.000698                     | 178.5905  | 183.3187  | 679.2347  |
|                                  | C                       | 2.088384  | 0.188163  | -0.000442                    | 697.2965  | 1225.1999 | 1279.0935 |
|                                  | H                       | 1.724619  | 1.227979  | -0.000441                    | 1407.9795 | 1537.037  | 1858.9497 |
|                                  | H                       | 3.179573  | 0.034758  | -0.001482                    | 2439.7529 | 2963.8966 | 3042.9404 |
|                                  | O                       | -1.737651 | -0.898334 | -0.000371                    |           |           |           |
|                                  | C                       | -1.260858 | 0.151537  | -0.000022                    |           |           |           |
| RC <sub>cat</sub> <sup>WM</sup>  | O                       | -0.828205 | -0.067364 | 1.17843                      | 62.0548   | 81.9293   | 101.173   |
|                                  | O                       | -1.356913 | 0.753725  | 0.231276                     | 116.056   | 127.8849  | 157.5479  |
|                                  | C                       | -1.174581 | 0.487317  | -0.964119                    | 167.4058  | 177.7876  | 225.6515  |
|                                  | H                       | -0.619612 | -0.402924 | -1.248902                    | 480.0927  | 561.7726  | 654.2646  |
|                                  | H                       | -1.613098 | 1.195509  | -1.656012                    | 711.619   | 910.1248  | 1095.7788 |
|                                  | O                       | 1.556385  | 1.063613  | -0.407607                    | 1291.7234 | 1469.7402 | 1628.5819 |
|                                  | C                       | 1.904256  | 0.536457  | 0.524016                     | 1649.9132 | 2236.1548 | 3116.5923 |
|                                  | O                       | 0.282091  | -2.065056 | -0.357754                    | 3271.166  | 3587.3124 | 3938.7121 |
|                                  | H                       | -0.048772 | -1.548728 | 0.400373                     |           |           |           |
|                                  | H                       | 0.676568  | -2.865841 | -0.009598                    |           |           |           |
| TS3 <sub>cat</sub> <sup>WM</sup> | O                       | 0.051584  | -0.374701 | 1.046528                     | -463.0239 | 28.1729   | 143.1803  |
|                                  | O                       | 0.274318  | 0.962535  | 0.74705                      | 156.4858  | 176.8795  | 267.0026  |
|                                  | C                       | 0.237083  | 1.130381  | -0.512347                    | 346.9112  | 371.6368  | 472.493   |
|                                  | H                       | -0.477141 | 0.580148  | -1.11108                     | 477.0026  | 591.4821  | 702.9409  |
|                                  | H                       | 0.700425  | 2.048718  | -0.852084                    | 803.759   | 984.2778  | 1141.2631 |
|                                  | O                       | 1.529032  | -0.402658 | -0.79227                     | 1257.156  | 1415.1492 | 1569.0308 |
|                                  | C                       | 1.25611   | -1.190621 | 0.04203                      | 1620.5791 | 1824.4079 | 3149.7681 |
|                                  | O                       | -2.373587 | -0.297794 | -0.402875                    | 3286.4159 | 3776.1718 | 3944.7605 |
|                                  | H                       | -1.814201 | -0.625401 | 0.343823                     |           |           |           |
|                                  | H                       | -3.21902  | -0.741086 | -0.316224                    |           |           |           |

| compound                         | cartesian coordinate(Å) |           |           | frequency( $\text{cm}^{-1}$ ) |           |           |           |
|----------------------------------|-------------------------|-----------|-----------|-------------------------------|-----------|-----------|-----------|
| PC <sup>WM</sup> <sub>cat</sub>  | O                       | -1.203961 | 1.221072  | -0.000508                     | 11.39     | 48.7386   | 68.197    |
|                                  | O                       | 0.689567  | -1.065309 | -0.000476                     | 78.921    | 107.1714  | 135.1259  |
|                                  | C                       | 1.827017  | -1.453401 | 0.000058                      | 158.8111  | 166.1379  | 177.0222  |
|                                  | H                       | 2.668665  | -0.746085 | 0.000639                      | 272.6641  | 446.1401  | 686.4288  |
|                                  | H                       | 2.055685  | -2.530653 | 0.000037                      | 696.0605  | 1236.8254 | 1288.4091 |
|                                  | O                       | -2.3923   | -0.76018  | 0.000517                      | 1410.2356 | 1540.74   | 1615.4512 |
|                                  | C                       | -1.786137 | 0.220293  | -0.000005                     | 1847.5811 | 2442.7889 | 2975.6081 |
|                                  | O                       | 1.937228  | 1.508857  | 0.000232                      | 3072.5832 | 3817.8255 | 3946.6627 |
|                                  | H                       | 1.111876  | 1.009114  | -0.000136                     |           |           |           |
| H                                | 1.674224                | 2.430752  | 0.00102   |                               |           |           |           |
| CI-WM                            | O                       | 0.473282  | -1.185947 | 0.185804                      | 110.0291  | 170.8853  | 222.4337  |
|                                  | O                       | 1.088024  | -0.076841 | -0.324213                     | 227.221   | 435.8778  | 535.2058  |
|                                  | C                       | 0.797367  | 1.017543  | 0.168923                      | 683.1509  | 714.847   | 895.9319  |
|                                  | H                       | 0.087788  | 1.067178  | 0.986579                      | 1080.0972 | 1270.1542 | 1455.3823 |
|                                  | H                       | 1.290426  | 1.872939  | -0.275681                     | 1640.6278 | 1662.7099 | 3140.6972 |
|                                  | O                       | -1.853691 | 0.211905  | -0.016529                     | 3286.5343 | 3550.2406 | 3937.0225 |
|                                  | H                       | -1.231877 | -0.53787  | 0.057151                      |           |           |           |
| H                                | -2.59146                | -0.100441 | -0.542076 |                               |           |           |           |
| WM-CO                            | O                       | 1.069794  | 0.205387  | 0.001228                      | 32.4226   | 71.0477   | 106.1902  |
|                                  | C                       | 2.11628   | -0.200261 | -0.001545                     | 132.3502  | 207.4264  | 1619.5945 |
|                                  | O                       | -2.155208 | -0.15651  | 0.000322                      | 2264.1188 | 3868.2754 | 3969.2895 |
|                                  | H                       | -1.268897 | 0.211247  | 0.004109                      |           |           |           |
|                                  | H                       | -2.745472 | 0.599302  | -0.00724                      |           |           |           |
| TS1 <sup>WM</sup> <sub>cat</sub> | C                       | 0.042979  | 1.107502  | 0.934391                      | -406.8409 | 26.77     | 118.7138  |
|                                  | O                       | 0.097857  | 1.549267  | -0.263843                     | 132.97    | 146.7253  | 168.493   |
|                                  | O                       | 0.127698  | 0.462375  | -1.116642                     | 213.6647  | 422.4229  | 442.7815  |
|                                  | C                       | -1.246802 | -0.364958 | 0.198741                      | 515.9257  | 610.6998  | 627.9782  |
|                                  | H                       | 0.668854  | 0.275185  | 1.238241                      | 852.4864  | 999.0864  | 1159.3541 |
|                                  | H                       | -0.308195 | 1.830762  | 1.664005                      | 1246.6414 | 1400.1414 | 1562.1243 |
|                                  | O                       | -1.766837 | -1.347422 | 0.013363                      | 1619.0598 | 2212.0645 | 3118.9463 |
|                                  | O                       | 1.892731  | -1.177628 | 0.234543                      | 3243.2466 | 3656.4514 | 3940.5954 |
|                                  | H                       | 1.467426  | -0.720941 | -0.510432                     |           |           |           |
| H                                | 2.583258                | -1.733013 | -0.129982 |                               |           |           |           |
| TS2 <sup>WM</sup> <sub>cat</sub> | O                       | -0.959775 | -1.178806 | -0.426468                     | -704.3882 | 29.0273   | 59.9997   |
|                                  | O                       | 0.303556  | -0.227113 | -0.126437                     | 101.5592  | 121.4006  | 179.4117  |
|                                  | C                       | -1.84507  | -1.003569 | 0.385182                      | 194.9272  | 265.3927  | 345.3013  |
|                                  | H                       | -1.708013 | -0.310084 | 1.213311                      | 452.0085  | 508.9288  | 529.6087  |
|                                  | H                       | -2.772976 | -1.563645 | 0.254391                      | 588.5608  | 673.9222  | 1191.6442 |
|                                  | O                       | 3.041136  | -0.079318 | 0.069624                      | 1252.1809 | 1483.1487 | 1640.5889 |
|                                  | C                       | 2.02769   | 0.411404  | 0.119791                      | 1772.7735 | 2205.8478 | 3074.61   |
|                                  | O                       | -1.658296 | 1.689114  | -0.002217                     | 3201.9046 | 3581.0038 | 3941.071  |
|                                  | H                       | -0.783691 | 1.276319  | -0.133598                     |           |           |           |
|                                  | H                       | -1.644006 | 2.519385  | -0.479961                     |           |           |           |

| compound                         | cartesian coordinate(Å) |           |           | frequency(cm <sup>-1</sup> ) |           |           |           |
|----------------------------------|-------------------------|-----------|-----------|------------------------------|-----------|-----------|-----------|
| RC <sup>WD</sup> <sub>cat</sub>  | O                       | 0.444324  | -0.902456 | 0.9069                       | 22.6468   | 46.2999   | 64.6629   |
|                                  | O                       | 0.189388  | 0.453902  | 1.061897                     | 84.75     | 91.2857   | 114.1249  |
|                                  | C                       | -0.104147 | 1.084109  | 0.041509                     | 162.2417  | 166.3993  | 173.8039  |
|                                  | H                       | -0.137451 | 0.576535  | -0.915446                    | 218.832   | 243.3605  | 282.6463  |
|                                  | H                       | -0.276549 | 2.143674  | 0.166808                     | 310.9418  | 425.4682  | 524.0827  |
|                                  | O                       | 2.609511  | 0.518132  | -0.668328                    | 550.8073  | 730.6268  | 743.3693  |
|                                  | C                       | 2.952387  | -0.51362  | -0.376344                    | 860.5341  | 887.9578  | 1117.4914 |
|                                  | O                       | -1.695367 | -1.532813 | -0.507637                    | 1258.3039 | 1452.155  | 1642.1093 |
|                                  | H                       | -0.885495 | -1.45759  | 0.061519                     | 1671.4995 | 1676.0722 | 2233.8615 |
|                                  | H                       | -2.051988 | -2.413001 | -0.382117                    | 3156.5146 | 3189.0347 | 3300.7458 |
|                                  | O                       | -2.54948  | 1.02219   | -0.384317                    | 3528.5178 | 3925.3923 | 3937.8836 |
|                                  | H                       | -3.23911  | 1.20795   | 0.2558                       |           |           |           |
|                                  | H                       | -2.485858 | 0.047858  | -0.445671                    |           |           |           |
| TS1 <sup>WD</sup> <sub>cat</sub> | C                       | 0.479116  | -0.796993 | 1.18376                      | -378.4092 | 35.2788   | 46.7069   |
|                                  | O                       | 0.485825  | -1.738595 | 0.319249                     | 71.1015   | 98.6406   | 127.784   |
|                                  | O                       | 0.108609  | -1.174407 | -0.903825                    | 156.146   | 173.0673  | 186.9048  |
|                                  | C                       | 1.425569  | 0.45239   | -0.084113                    | 228.873   | 257.6012  | 344.4801  |
|                                  | H                       | -0.330298 | -0.076906 | 1.211583                     | 410.2165  | 474.9591  | 515.769   |
|                                  | H                       | 1.03867   | -1.012105 | 2.090622                     | 602.4895  | 665.2213  | 868.2031  |
|                                  | O                       | 1.969526  | 1.22628   | -0.686715                    | 895.268   | 986.2511  | 1185.148  |
|                                  | O                       | -0.898588 | 1.926437  | 0.551946                     | 1229.9366 | 1392.3819 | 1563.46   |
|                                  | H                       | -1.594165 | 1.385302  | 0.137521                     | 1628.1726 | 1643.2565 | 2260.416  |
|                                  | H                       | -0.977102 | 2.806787  | 0.181595                     | 3130.2921 | 3249.1125 | 3260.7863 |
|                                  | O                       | -2.295033 | -0.210421 | -0.36964                     | 3633.5404 | 3938.4316 | 3942.8978 |
|                                  | H                       | -3.049185 | -0.612539 | -0.801416                    |           |           |           |
|                                  | H                       | -1.478743 | -0.65728  | -0.705908                    |           |           |           |
| WD                               | O                       | 1.504931  | 0.009816  | -0.120973                    | 84.5182   | 126.783   | 148.4515  |
|                                  | H                       | 0.556624  | -0.005585 | 0.063449                     | 193.5486  | 355.6011  | 606.3369  |
|                                  | H                       | 1.934985  | -0.061144 | 0.732492                     | 1618.9862 | 1635.644  | 3772.5038 |
|                                  | O                       | -1.386115 | -0.007941 | 0.111671                     | 3859.7328 | 3944.091  | 3958.8595 |
|                                  | H                       | -1.723819 | -0.73758  | -0.413414                    |           |           |           |
|                                  | H                       | -1.718313 | 0.789302  | -0.308107                    |           |           |           |
| CI-WD                            | C                       | 0.992857  | 1.136948  | -0.159209                    | 41.8972   | 97.4679   | 160.7208  |
|                                  | O                       | 1.280777  | 0.110797  | 0.45911                      | 216.8151  | 231.5149  | 271.3756  |
|                                  | O                       | 1.25365   | -1.072317 | -0.279911                    | 287.3066  | 293.4652  | 449.2527  |
|                                  | H                       | 0.793221  | 1.07351   | -1.221611                    | 478.4996  | 525.5963  | 720.3005  |
|                                  | H                       | 1.00602   | 2.0581    | 0.406997                     | 835.8207  | 863.729   | 972.4596  |
|                                  | O                       | -1.439344 | 1.293205  | 0.049914                     | 1110.752  | 1255.3886 | 1447.9704 |
|                                  | H                       | -1.566177 | 0.317571  | 0.074398                     | 1632.9366 | 1661.7728 | 1685.7502 |
|                                  | H                       | -2.131023 | 1.63671   | -0.518922                    | 3156.7731 | 3185.4551 | 3299.8708 |
|                                  | O                       | -1.359331 | -1.393706 | -0.02343                     | 3409.448  | 3920.9668 | 3928.4911 |
|                                  | H                       | -1.57138  | -1.978283 | 0.706059                     |           |           |           |
|                                  | H                       | -0.37381  | -1.433131 | -0.137133                    |           |           |           |
| WD-CO                            | C                       | 1.253842  | -0.668707 | 0.00903                      | 75.3634   | 83.555    | 118.0603  |
|                                  | O                       | 2.254045  | -0.166202 | -0.009127                    | 140.3226  | 145.8441  | 179.8125  |
|                                  | O                       | -0.617154 | 1.564124  | 0.082974                     | 196.5079  | 233.8935  | 283.9718  |
|                                  | H                       | -1.2943   | 0.878975  | -0.006124                    | 479.6977  | 634.0547  | 1616.8034 |
|                                  | H                       | -0.934349 | 2.319359  | -0.414857                    | 1636.6889 | 2291.1837 | 3748.3335 |
|                                  | O                       | -1.88453  | -0.96527  | -0.100884                    | 3814.9842 | 3939.9421 | 3940.5497 |
|                                  | H                       | -2.350563 | -1.407693 | 0.611614                     |           |           |           |
|                                  | H                       | -0.962733 | -1.239611 | -0.02852                     |           |           |           |

| compound                         | cartesian coordinate(Å) |           |           | frequency(cm <sup>-1</sup> ) |           |           |           |
|----------------------------------|-------------------------|-----------|-----------|------------------------------|-----------|-----------|-----------|
| TS2 <sup>WD</sup> <sub>cat</sub> | C                       | 1.185705  | -1.428046 | 0.355514                     | -695.0639 | 24.8734   | 48.4629   |
|                                  | O                       | 0.370809  | -1.315019 | -0.54306                     | 68.9148   | 88.1388   | 156.1938  |
|                                  | O                       | -0.805242 | -0.282763 | -0.136603                    | 197.3566  | 218.5549  | 255.0682  |
|                                  | H                       | 1.045487  | -0.899265 | 1.295618                     | 264.5364  | 270.6748  | 295.4385  |
|                                  | H                       | 2.012205  | -2.122339 | 0.22088                      | 419.5113  | 450.2917  | 484.6648  |
|                                  | C                       | -2.463041 | 0.416642  | 0.184463                     | 511.6433  | 548.5754  | 674.3575  |
|                                  | O                       | -3.495035 | -0.031478 | 0.103648                     | 753.4014  | 897.0326  | 1182.2755 |
|                                  | O                       | 2.907983  | 0.257264  | 0.203728                     | 1236.7701 | 1467.6657 | 1640.7576 |
|                                  | H                       | 2.258071  | 0.983153  | 0.077597                     | 1664.4845 | 1742.7227 | 2197.8419 |
|                                  | H                       | 3.532255  | 0.3316    | -0.520927                    | 3102.8511 | 3222.3925 | 3310.2472 |
|                                  | O                       | 0.80272   | 1.873533  | -0.185862                    | 3448.4461 | 3920.4339 | 3931.0703 |
|                                  | H                       | 0.463658  | 2.584472  | 0.360246                     |           |           |           |
|                                  | H                       | 0.10246   | 1.178502  | -0.208081                    |           |           |           |
| TS3 <sup>WD</sup> <sub>cat</sub> | O                       | -0.505154 | -1.089726 | 0.520283                     | -465.5737 | 32.1004   | 33.4086   |
|                                  | O                       | -1.002737 | -1.015933 | -0.777157                    | 58.4753   | 156.224   | 160.2531  |
|                                  | C                       | -0.847173 | 0.17122   | -1.21489                     | 185.4797  | 191.7129  | 223.0056  |
|                                  | H                       | 0.044144  | 0.742292  | -0.965817                    | 276.1872  | 332.6902  | 352.3984  |
|                                  | H                       | -1.476406 | 0.407368  | -2.065338                    | 357.2672  | 473.5419  | 573.361   |
|                                  | O                       | -1.677566 | 0.948266  | 0.43159                      | 592.6946  | 706.9192  | 709.9714  |
|                                  | C                       | -1.317825 | 0.255937  | 1.317582                     | 836.6575  | 990.0953  | 1195.6367 |
|                                  | O                       | 2.278863  | -0.997462 | 0.159689                     | 1256.1617 | 1411.2642 | 1569.3577 |
|                                  | H                       | 1.374029  | -1.224616 | 0.42614                      | 1613.3883 | 1636.5582 | 1821.3764 |
|                                  | H                       | 2.853808  | -1.691253 | 0.485719                     | 3100.9262 | 3256.4572 | 3674.2295 |
|                                  | O                       | 1.698357  | 1.674794  | -0.219024                    | 3711.6971 | 3932.73   | 3942.03   |
|                                  | H                       | 1.708175  | 2.199733  | 0.583377                     |           |           |           |
|                                  | H                       | 2.152146  | 0.844016  | -0.003278                    |           |           |           |
| PC <sup>WD</sup> <sub>cat</sub>  | O                       | 0.982127  | 1.492283  | 0.493312                     | 75.9137   | 85.6545   | 92.0472   |
|                                  | O                       | -0.528791 | -1.103665 | 1.11698                      | 117.9353  | 122.4304  | 128.1177  |
|                                  | C                       | -0.566304 | -1.875569 | 0.193457                     | 155.5737  | 185.2245  | 189.6703  |
|                                  | H                       | -1.519836 | -2.195714 | -0.249263                    | 205.5041  | 227.0916  | 237.0734  |
|                                  | H                       | 0.352327  | -2.29342  | -0.239205                    | 287.7149  | 326.6071  | 390.8546  |
|                                  | O                       | 2.151601  | -0.387333 | -0.168516                    | 625.1711  | 682.1884  | 687.8876  |
|                                  | C                       | 1.547014  | 0.540765  | 0.155564                     | 747.4373  | 1221.7799 | 1279.3576 |
|                                  | O                       | -2.022754 | 1.199019  | 0.334642                     | 1409.27   | 1540.0337 | 1640.3607 |
|                                  | H                       | -1.729514 | 0.471527  | 0.902316                     | 1646.9701 | 1836.0966 | 2440.9566 |
|                                  | H                       | -1.45799  | 1.935751  | 0.584785                     | 2994.7219 | 3082.2735 | 3603.4949 |
|                                  | O                       | -0.541224 | -0.02794  | -1.6927                      | 3762.5981 | 3907.3388 | 3931.4774 |
|                                  | H                       | -0.704773 | 0.204356  | -2.608439                    |           |           |           |
|                                  | H                       | -1.152145 | 0.507414  | -1.154068                    |           |           |           |

Table S2: Bimolecular rate constant  $k_b$  in ( $\text{cm}^3 \text{ molecule}^{-1} \text{ sec}^{-1}$ ) for  $\text{H}_2\text{O}$  catalyzed channel corresponds to TS1 within temperature range 213-1400 K

| Temp (K) | path A                 | path B                 | path C                 | uncat                  |
|----------|------------------------|------------------------|------------------------|------------------------|
| 213      | $2.43 \times 10^{-19}$ | $2.11 \times 10^{-24}$ | $2.47 \times 10^{-20}$ | $3.71 \times 10^{-24}$ |
| 216      | $2.82 \times 10^{-19}$ | $2.97 \times 10^{-24}$ | $2.75 \times 10^{-20}$ | $5.08 \times 10^{-24}$ |
| 219      | $3.26 \times 10^{-19}$ | $4.13 \times 10^{-24}$ | $3.06 \times 10^{-20}$ | $6.89 \times 10^{-24}$ |
| 224      | $4.12 \times 10^{-19}$ | $7.04 \times 10^{-24}$ | $3.63 \times 10^{-20}$ | $1.13 \times 10^{-23}$ |
| 235      | $6.66 \times 10^{-19}$ | $2.11 \times 10^{-23}$ | $5.15 \times 10^{-20}$ | $3.09 \times 10^{-23}$ |
| 250      | $1.20 \times 10^{-18}$ | $8.06 \times 10^{-23}$ | $7.91 \times 10^{-20}$ | $1.07 \times 10^{-22}$ |
| 259      | $1.66 \times 10^{-18}$ | $1.68 \times 10^{-22}$ | $1.00 \times 10^{-19}$ | $2.09 \times 10^{-22}$ |
| 265      | $2.03 \times 10^{-18}$ | $2.66 \times 10^{-22}$ | $1.16 \times 10^{-19}$ | $3.20 \times 10^{-22}$ |
| 278      | $3.06 \times 10^{-18}$ | $6.79 \times 10^{-22}$ | $1.57 \times 10^{-19}$ | $7.58 \times 10^{-22}$ |
| 280      | $3.25 \times 10^{-18}$ | $7.79 \times 10^{-22}$ | $1.64 \times 10^{-19}$ | $8.59 \times 10^{-22}$ |
| 290      | $4.34 \times 10^{-18}$ | $1.50 \times 10^{-21}$ | $2.02 \times 10^{-19}$ | $1.57 \times 10^{-21}$ |
| 298      | $5.39 \times 10^{-18}$ | $2.46 \times 10^{-21}$ | $2.37 \times 10^{-19}$ | $2.48 \times 10^{-21}$ |
| 300      | $5.68 \times 10^{-18}$ | $2.77 \times 10^{-21}$ | $2.46 \times 10^{-19}$ | $2.76 \times 10^{-21}$ |
| 310      | $7.33 \times 10^{-18}$ | $4.93 \times 10^{-21}$ | $2.97 \times 10^{-19}$ | $4.69 \times 10^{-21}$ |
| 320      | $9.32 \times 10^{-18}$ | $8.47 \times 10^{-21}$ | $3.54 \times 10^{-19}$ | $7.72 \times 10^{-21}$ |
| 330      | $1.17 \times 10^{-17}$ | $1.41 \times 10^{-20}$ | $4.19 \times 10^{-19}$ | $1.23 \times 10^{-20}$ |
| 350      | $1.78 \times 10^{-17}$ | $3.60 \times 10^{-20}$ | $5.70 \times 10^{-19}$ | $2.92 \times 10^{-20}$ |
| 375      | $2.83 \times 10^{-17}$ | $1.02 \times 10^{-19}$ | $8.05 \times 10^{-19}$ | $7.60 \times 10^{-20}$ |
| 400      | $4.29 \times 10^{-17}$ | $2.55 \times 10^{-19}$ | $1.10 \times 10^{-18}$ | $1.77 \times 10^{-19}$ |
| 425      | $6.22 \times 10^{-17}$ | $5.76 \times 10^{-19}$ | $1.45 \times 10^{-18}$ | $3.74 \times 10^{-19}$ |
| 450      | $8.72 \times 10^{-17}$ | $1.20 \times 10^{-18}$ | $1.87 \times 10^{-18}$ | $7.33 \times 10^{-19}$ |
| 475      | $1.19 \times 10^{-16}$ | $2.32 \times 10^{-18}$ | $2.36 \times 10^{-18}$ | $1.35 \times 10^{-18}$ |
| 500      | $1.57 \times 10^{-16}$ | $4.23 \times 10^{-18}$ | $2.93 \times 10^{-18}$ | $2.34 \times 10^{-18}$ |
| 550      | $2.60 \times 10^{-16}$ | $1.21 \times 10^{-17}$ | $4.31 \times 10^{-18}$ | $6.15 \times 10^{-18}$ |
| 600      | $4.02 \times 10^{-16}$ | $2.95 \times 10^{-17}$ | $6.04 \times 10^{-18}$ | $1.40 \times 10^{-17}$ |
| 650      | $5.90 \times 10^{-16}$ | $6.36 \times 10^{-17}$ | $8.18 \times 10^{-18}$ | $2.84 \times 10^{-17}$ |
| 700      | $8.31 \times 10^{-16}$ | $1.24 \times 10^{-16}$ | $1.07 \times 10^{-17}$ | $5.29 \times 10^{-17}$ |
| 750      | $1.13 \times 10^{-15}$ | $2.25 \times 10^{-16}$ | $1.37 \times 10^{-17}$ | $9.14 \times 10^{-17}$ |
| 800      | $1.50 \times 10^{-15}$ | $3.82 \times 10^{-16}$ | $1.73 \times 10^{-17}$ | $1.49 \times 10^{-16}$ |
| 850      | $1.94 \times 10^{-15}$ | $6.14 \times 10^{-16}$ | $2.13 \times 10^{-17}$ | $2.32 \times 10^{-16}$ |
| 900      | $2.46 \times 10^{-15}$ | $9.45 \times 10^{-16}$ | $2.59 \times 10^{-17}$ | $3.45 \times 10^{-16}$ |
| 950      | $3.07 \times 10^{-15}$ | $1.40 \times 10^{-15}$ | $3.11 \times 10^{-17}$ | $4.97 \times 10^{-16}$ |
| 1000     | $3.78 \times 10^{-15}$ | $2.00 \times 10^{-15}$ | $3.70 \times 10^{-17}$ | $6.93 \times 10^{-16}$ |
| 1100     | $5.49 \times 10^{-15}$ | $3.78 \times 10^{-15}$ | $5.08 \times 10^{-17}$ | $1.25 \times 10^{-15}$ |
| 1200     | $7.68 \times 10^{-15}$ | $6.55 \times 10^{-15}$ | $6.75 \times 10^{-17}$ | $2.09 \times 10^{-15}$ |
| 1300     | $1.04 \times 10^{-14}$ | $1.06 \times 10^{-14}$ | $8.76 \times 10^{-17}$ | $3.28 \times 10^{-15}$ |
| 1400     | $1.36 \times 10^{-14}$ | $1.62 \times 10^{-14}$ | $1.11 \times 10^{-16}$ | $4.88 \times 10^{-15}$ |



Table S3: Bimolecular rate constant  $k_b$  in ( $\text{cm}^3 \text{ molecule}^{-1} \text{ sec}^{-1}$ ) for  $\text{H}_2\text{O}$  catalyzed channel corresponds to TS2 within temperature range 213-1400 K

| Temp (K) | path A                 | path B                 | path C                 | uncat                  |
|----------|------------------------|------------------------|------------------------|------------------------|
| 213      | $9.02 \times 10^{-19}$ | $7.84 \times 10^{-24}$ | $9.17 \times 10^{-20}$ | $5.63 \times 10^{-26}$ |
| 216      | $1.06 \times 10^{-18}$ | $1.11 \times 10^{-23}$ | $1.03 \times 10^{-19}$ | $8.57 \times 10^{-26}$ |
| 219      | $1.23 \times 10^{-18}$ | $1.56 \times 10^{-23}$ | $1.16 \times 10^{-19}$ | $1.29 \times 10^{-25}$ |
| 224      | $1.58 \times 10^{-18}$ | $2.71 \times 10^{-23}$ | $1.39 \times 10^{-19}$ | $2.48 \times 10^{-25}$ |
| 235      | $2.65 \times 10^{-18}$ | $8.36 \times 10^{-23}$ | $2.05 \times 10^{-19}$ | $9.60 \times 10^{-25}$ |
| 250      | $4.99 \times 10^{-18}$ | $3.35 \times 10^{-22}$ | $3.28 \times 10^{-19}$ | $5.04 \times 10^{-24}$ |
| 259      | $7.06 \times 10^{-18}$ | $7.16 \times 10^{-22}$ | $4.26 \times 10^{-19}$ | $1.25 \times 10^{-23}$ |
| 265      | $8.81 \times 10^{-18}$ | $1.16 \times 10^{-21}$ | $5.03 \times 10^{-19}$ | $2.21 \times 10^{-23}$ |
| 278      | $1.38 \times 10^{-17}$ | $3.06 \times 10^{-21}$ | $7.05 \times 10^{-19}$ | $7.07 \times 10^{-23}$ |
| 280      | $1.47 \times 10^{-17}$ | $3.53 \times 10^{-21}$ | $7.41 \times 10^{-19}$ | $8.37 \times 10^{-23}$ |
| 290      | $2.02 \times 10^{-17}$ | $6.98 \times 10^{-21}$ | $9.40 \times 10^{-19}$ | $1.89 \times 10^{-22}$ |
| 298      | $2.56 \times 10^{-17}$ | $1.17 \times 10^{-20}$ | $1.13 \times 10^{-18}$ | $3.49 \times 10^{-22}$ |
| 300      | $2.72 \times 10^{-17}$ | $1.33 \times 10^{-20}$ | $1.18 \times 10^{-18}$ | $4.05 \times 10^{-22}$ |
| 310      | $3.60 \times 10^{-17}$ | $2.42 \times 10^{-20}$ | $1.46 \times 10^{-18}$ | $8.30 \times 10^{-22}$ |
| 320      | $4.69 \times 10^{-17}$ | $4.27 \times 10^{-20}$ | $1.78 \times 10^{-18}$ | $1.63 \times 10^{-21}$ |
| 330      | $6.04 \times 10^{-17}$ | $7.29 \times 10^{-20}$ | $2.16 \times 10^{-18}$ | $3.08 \times 10^{-21}$ |
| 350      | $9.63 \times 10^{-17}$ | $1.95 \times 10^{-19}$ | $3.09 \times 10^{-18}$ | $9.91 \times 10^{-21}$ |
| 375      | $1.63 \times 10^{-16}$ | $5.85 \times 10^{-19}$ | $4.62 \times 10^{-18}$ | $3.63 \times 10^{-20}$ |
| 400      | $2.60 \times 10^{-16}$ | $1.54 \times 10^{-18}$ | $6.65 \times 10^{-18}$ | $1.14 \times 10^{-19}$ |
| 425      | $3.96 \times 10^{-16}$ | $3.67 \times 10^{-18}$ | $9.24 \times 10^{-18}$ | $3.18 \times 10^{-19}$ |
| 450      | $5.82 \times 10^{-16}$ | $7.99 \times 10^{-18}$ | $1.25 \times 10^{-17}$ | $7.96 \times 10^{-19}$ |
| 475      | $8.27 \times 10^{-16}$ | $1.62 \times 10^{-17}$ | $1.65 \times 10^{-17}$ | $1.82 \times 10^{-18}$ |
| 500      | $1.14 \times 10^{-15}$ | $3.07 \times 10^{-17}$ | $2.13 \times 10^{-17}$ | $3.87 \times 10^{-18}$ |
| 550      | $2.03 \times 10^{-15}$ | $9.46 \times 10^{-17}$ | $3.37 \times 10^{-17}$ | $1.44 \times 10^{-17}$ |
| 600      | $3.36 \times 10^{-15}$ | $2.46 \times 10^{-16}$ | $5.05 \times 10^{-17}$ | $4.42 \times 10^{-17}$ |
| 650      | $5.22 \times 10^{-15}$ | $5.63 \times 10^{-16}$ | $7.24 \times 10^{-17}$ | $1.16 \times 10^{-16}$ |
| 700      | $7.74 \times 10^{-15}$ | $1.16 \times 10^{-15}$ | $1.00 \times 10^{-16}$ | $2.68 \times 10^{-16}$ |
| 750      | $1.10 \times 10^{-14}$ | $2.20 \times 10^{-15}$ | $1.34 \times 10^{-16}$ | $5.60 \times 10^{-16}$ |
| 800      | $1.52 \times 10^{-14}$ | $3.89 \times 10^{-15}$ | $1.76 \times 10^{-16}$ | $1.08 \times 10^{-15}$ |
| 850      | $2.05 \times 10^{-14}$ | $6.48 \times 10^{-15}$ | $2.25 \times 10^{-16}$ | $1.95 \times 10^{-15}$ |
| 900      | $2.69 \times 10^{-14}$ | $1.03 \times 10^{-14}$ | $2.83 \times 10^{-16}$ | $3.32 \times 10^{-15}$ |
| 950      | $3.45 \times 10^{-14}$ | $1.57 \times 10^{-14}$ | $3.50 \times 10^{-16}$ | $5.39 \times 10^{-15}$ |
| 1000     | $4.37 \times 10^{-14}$ | $2.32 \times 10^{-14}$ | $4.28 \times 10^{-16}$ | $8.38 \times 10^{-15}$ |
| 1100     | $6.67 \times 10^{-14}$ | $4.59 \times 10^{-14}$ | $6.17 \times 10^{-16}$ | $1.83 \times 10^{-14}$ |
| 1200     | $9.72 \times 10^{-14}$ | $8.29 \times 10^{-14}$ | $8.55 \times 10^{-16}$ | $3.58 \times 10^{-14}$ |
| 1300     | $1.36 \times 10^{-13}$ | $1.39 \times 10^{-13}$ | $1.15 \times 10^{-15}$ | $6.41 \times 10^{-14}$ |
| 1400     | $1.85 \times 10^{-13}$ | $2.19 \times 10^{-13}$ | $1.51 \times 10^{-15}$ | $1.07 \times 10^{-13}$ |

Table S4: Bimolecular rate constant  $k_b$  in ( $\text{cm}^3 \text{ molecule}^{-1} \text{ sec}^{-1}$ ) for  $\text{H}_2\text{O}$  catalyzed channel corresponds to TS3, within temperature range 213-1400 K

| Temp (K) | path A                 | path B                 | path C                 | uncat                  |
|----------|------------------------|------------------------|------------------------|------------------------|
| 213      | $6.37 \times 10^{-24}$ | $5.53 \times 10^{-29}$ | $6.48 \times 10^{-25}$ | $1.14 \times 10^{-27}$ |
| 216      | $8.39 \times 10^{-24}$ | $8.81 \times 10^{-29}$ | $8.18 \times 10^{-25}$ | $1.71 \times 10^{-27}$ |
| 219      | $1.09 \times 10^{-23}$ | $1.39 \times 10^{-28}$ | $1.03 \times 10^{-24}$ | $2.55 \times 10^{-27}$ |
| 224      | $1.68 \times 10^{-23}$ | $2.87 \times 10^{-28}$ | $1.48 \times 10^{-24}$ | $4.81 \times 10^{-27}$ |
| 235      | $4.05 \times 10^{-23}$ | $1.28 \times 10^{-27}$ | $3.13 \times 10^{-24}$ | $1.77 \times 10^{-26}$ |
| 250      | $1.19 \times 10^{-22}$ | $7.98 \times 10^{-27}$ | $7.83 \times 10^{-24}$ | $8.76 \times 10^{-26}$ |
| 259      | $2.14 \times 10^{-22}$ | $2.17 \times 10^{-26}$ | $1.29 \times 10^{-23}$ | $2.09 \times 10^{-25}$ |
| 265      | $3.09 \times 10^{-22}$ | $4.06 \times 10^{-26}$ | $1.77 \times 10^{-23}$ | $3.62 \times 10^{-25}$ |
| 278      | $6.52 \times 10^{-22}$ | $1.45 \times 10^{-25}$ | $3.34 \times 10^{-23}$ | $1.10 \times 10^{-24}$ |
| 280      | $7.27 \times 10^{-22}$ | $1.74 \times 10^{-25}$ | $3.66 \times 10^{-23}$ | $1.29 \times 10^{-24}$ |
| 290      | $1.23 \times 10^{-21}$ | $4.24 \times 10^{-25}$ | $5.71 \times 10^{-23}$ | $2.80 \times 10^{-24}$ |
| 298      | $1.82 \times 10^{-21}$ | $8.28 \times 10^{-25}$ | $7.99 \times 10^{-23}$ | $5.02 \times 10^{-24}$ |
| 300      | $2.00 \times 10^{-21}$ | $9.74 \times 10^{-25}$ | $8.66 \times 10^{-23}$ | $5.78 \times 10^{-24}$ |
| 310      | $3.16 \times 10^{-21}$ | $2.12 \times 10^{-24}$ | $1.28 \times 10^{-22}$ | $1.14 \times 10^{-23}$ |
| 320      | $4.86 \times 10^{-21}$ | $4.42 \times 10^{-24}$ | $1.85 \times 10^{-22}$ | $2.15 \times 10^{-23}$ |
| 330      | $7.30 \times 10^{-21}$ | $8.80 \times 10^{-24}$ | $2.61 \times 10^{-22}$ | $3.93 \times 10^{-23}$ |
| 350      | $1.54 \times 10^{-20}$ | $3.12 \times 10^{-23}$ | $4.93 \times 10^{-22}$ | $1.18 \times 10^{-22}$ |
| 375      | $3.51 \times 10^{-20}$ | $1.26 \times 10^{-22}$ | $9.99 \times 10^{-22}$ | $3.99 \times 10^{-22}$ |
| 400      | $7.28 \times 10^{-20}$ | $4.33 \times 10^{-22}$ | $1.86 \times 10^{-21}$ | $1.16 \times 10^{-21}$ |
| 425      | $1.39 \times 10^{-19}$ | $1.29 \times 10^{-21}$ | $3.25 \times 10^{-21}$ | $3.01 \times 10^{-21}$ |
| 450      | $2.50 \times 10^{-19}$ | $3.43 \times 10^{-21}$ | $5.36 \times 10^{-21}$ | $7.06 \times 10^{-21}$ |
| 475      | $4.24 \times 10^{-19}$ | $8.28 \times 10^{-21}$ | $8.44 \times 10^{-21}$ | $1.52 \times 10^{-20}$ |
| 500      | $6.85 \times 10^{-19}$ | $1.84 \times 10^{-20}$ | $1.28 \times 10^{-20}$ | $3.04 \times 10^{-20}$ |
| 550      | $1.59 \times 10^{-18}$ | $7.41 \times 10^{-20}$ | $2.64 \times 10^{-20}$ | $1.02 \times 10^{-19}$ |
| 600      | $3.28 \times 10^{-18}$ | $2.41 \times 10^{-19}$ | $4.93 \times 10^{-20}$ | $2.86 \times 10^{-19}$ |
| 650      | $6.13 \times 10^{-18}$ | $6.61 \times 10^{-19}$ | $8.50 \times 10^{-20}$ | $6.90 \times 10^{-19}$ |
| 700      | $1.06 \times 10^{-17}$ | $1.59 \times 10^{-18}$ | $1.37 \times 10^{-19}$ | $1.49 \times 10^{-18}$ |
| 750      | $1.73 \times 10^{-17}$ | $3.45 \times 10^{-18}$ | $2.11 \times 10^{-19}$ | $2.93 \times 10^{-18}$ |
| 800      | $2.69 \times 10^{-17}$ | $6.86 \times 10^{-18}$ | $3.10 \times 10^{-19}$ | $5.35 \times 10^{-18}$ |
| 850      | $4.01 \times 10^{-17}$ | $1.27 \times 10^{-17}$ | $4.40 \times 10^{-19}$ | $9.17 \times 10^{-18}$ |
| 900      | $5.76 \times 10^{-17}$ | $2.21 \times 10^{-17}$ | $6.07 \times 10^{-19}$ | $1.49 \times 10^{-17}$ |
| 950      | $8.04 \times 10^{-17}$ | $3.66 \times 10^{-17}$ | $8.15 \times 10^{-19}$ | $2.33 \times 10^{-17}$ |
| 1000     | $1.09 \times 10^{-16}$ | $5.80 \times 10^{-17}$ | $1.07 \times 10^{-18}$ | $3.49 \times 10^{-17}$ |
| 1100     | $1.89 \times 10^{-16}$ | $1.30 \times 10^{-16}$ | $1.75 \times 10^{-18}$ | $7.15 \times 10^{-17}$ |
| 1200     | $3.06 \times 10^{-16}$ | $2.61 \times 10^{-16}$ | $2.70 \times 10^{-18}$ | $1.32 \times 10^{-16}$ |
| 1300     | $4.69 \times 10^{-16}$ | $4.78 \times 10^{-16}$ | $3.96 \times 10^{-18}$ | $2.27 \times 10^{-16}$ |
| 1400     | $6.86 \times 10^{-16}$ | $8.14 \times 10^{-16}$ | $5.59 \times 10^{-18}$ | $3.64 \times 10^{-16}$ |

Table S5: The total bimolecular rate constant  $k_b$  in ( $\text{cm}^3 \text{ molecule}^{-1} \text{ sec}^{-1}$ ) for  $\text{H}_2\text{O}$  catalyzed and uncatalyzed channel, within the temperature range of 213-1400 K

| Temp (K) | $k_{tot}^{cat}$        | $k_{tot}^{uncat}$      | $k_{tot}$              |
|----------|------------------------|------------------------|------------------------|
| 213      | $6.03 \times 10^{-19}$ | $3.77 \times 10^{-24}$ | $6.03 \times 10^{-19}$ |
| 216      | $6.95 \times 10^{-19}$ | $5.17 \times 10^{-24}$ | $6.95 \times 10^{-19}$ |
| 219      | $7.99 \times 10^{-19}$ | $7.03 \times 10^{-24}$ | $7.99 \times 10^{-19}$ |
| 224      | $1.00 \times 10^{-18}$ | $1.15 \times 10^{-23}$ | $1.00 \times 10^{-18}$ |
| 235      | $1.59 \times 10^{-18}$ | $3.19 \times 10^{-23}$ | $1.59 \times 10^{-18}$ |
| 250      | $2.81 \times 10^{-18}$ | $1.12 \times 10^{-22}$ | $2.81 \times 10^{-18}$ |
| 259      | $3.84 \times 10^{-18}$ | $2.22 \times 10^{-22}$ | $3.84 \times 10^{-18}$ |
| 265      | $4.68 \times 10^{-18}$ | $3.43 \times 10^{-22}$ | $4.68 \times 10^{-18}$ |
| 278      | $6.99 \times 10^{-18}$ | $8.30 \times 10^{-22}$ | $6.99 \times 10^{-18}$ |
| 280      | $7.41 \times 10^{-18}$ | $9.44 \times 10^{-22}$ | $7.41 \times 10^{-18}$ |
| 290      | $9.83 \times 10^{-18}$ | $1.76 \times 10^{-21}$ | $9.83 \times 10^{-18}$ |
| 298      | $1.22 \times 10^{-17}$ | $2.83 \times 10^{-21}$ | $1.22 \times 10^{-17}$ |
| 300      | $1.28 \times 10^{-17}$ | $3.17 \times 10^{-21}$ | $1.28 \times 10^{-17}$ |
| 310      | $1.65 \times 10^{-17}$ | $5.53 \times 10^{-21}$ | $1.65 \times 10^{-17}$ |
| 320      | $2.08 \times 10^{-17}$ | $9.37 \times 10^{-21}$ | $2.08 \times 10^{-17}$ |
| 330      | $7.48 \times 10^{-17}$ | $1.55 \times 10^{-20}$ | $7.48 \times 10^{-17}$ |
| 350      | $1.18 \times 10^{-16}$ | $3.93 \times 10^{-20}$ | $1.18 \times 10^{-16}$ |
| 375      | $1.97 \times 10^{-16}$ | $1.13 \times 10^{-19}$ | $1.97 \times 10^{-16}$ |
| 400      | $3.12 \times 10^{-16}$ | $2.92 \times 10^{-19}$ | $3.12 \times 10^{-16}$ |
| 425      | $4.74 \times 10^{-16}$ | $6.95 \times 10^{-19}$ | $4.74 \times 10^{-16}$ |
| 450      | $6.93 \times 10^{-16}$ | $1.54 \times 10^{-18}$ | $6.94 \times 10^{-16}$ |
| 475      | $9.83 \times 10^{-16}$ | $3.18 \times 10^{-18}$ | $9.86 \times 10^{-16}$ |
| 500      | $1.36 \times 10^{-15}$ | $6.24 \times 10^{-18}$ | $1.37 \times 10^{-15}$ |
| 550      | $2.44 \times 10^{-15}$ | $2.07 \times 10^{-17}$ | $2.46 \times 10^{-15}$ |
| 600      | $4.10 \times 10^{-15}$ | $5.84 \times 10^{-17}$ | $4.15 \times 10^{-15}$ |
| 650      | $6.53 \times 10^{-15}$ | $1.45 \times 10^{-16}$ | $6.67 \times 10^{-15}$ |
| 700      | $9.98 \times 10^{-15}$ | $3.22 \times 10^{-16}$ | $1.03 \times 10^{-14}$ |
| 750      | $1.48 \times 10^{-14}$ | $6.55 \times 10^{-16}$ | $1.54 \times 10^{-14}$ |
| 800      | $2.12 \times 10^{-14}$ | $1.24 \times 10^{-15}$ | $2.25 \times 10^{-14}$ |
| 850      | $2.98 \times 10^{-14}$ | $2.19 \times 10^{-15}$ | $3.20 \times 10^{-14}$ |
| 900      | $4.10 \times 10^{-14}$ | $3.68 \times 10^{-15}$ | $4.47 \times 10^{-14}$ |
| 950      | $5.52 \times 10^{-14}$ | $5.91 \times 10^{-15}$ | $6.12 \times 10^{-14}$ |
| 1000     | $7.32 \times 10^{-14}$ | $9.11 \times 10^{-15}$ | $8.24 \times 10^{-14}$ |
| 1100     | $1.23 \times 10^{-13}$ | $1.96 \times 10^{-14}$ | $1.43 \times 10^{-13}$ |
| 1200     | $1.96 \times 10^{-13}$ | $3.80 \times 10^{-14}$ | $2.34 \times 10^{-13}$ |
| 1300     | $2.98 \times 10^{-13}$ | $6.76 \times 10^{-14}$ | $3.66 \times 10^{-13}$ |
| 1400     | $4.37 \times 10^{-13}$ | $1.12 \times 10^{-13}$ | $5.49 \times 10^{-13}$ |

Table S6: Relative energies ( $\Delta E$ ) including ZPE in kcal mol<sup>1</sup> for all the species with respect to the isolated reactants at the CCSD(T)/CBS level of theory in the presence of H<sub>2</sub>O as a catalyst.

| Species             | $\Delta E$ |
|---------------------|------------|
| CI-CO               | -1.48      |
| PC <sub>uncat</sub> | -121.43    |
| RC <sub>cat</sub>   | -8.50      |
| TS1 <sub>cat</sub>  | 3.48       |
| TS2 <sub>cat</sub>  | 3.38       |
| TS3 <sub>cat</sub>  | 7.43       |
| PC <sub>cat</sub>   | -125.26    |
| Product             | -119.22    |
| CI-WM               | -6.75      |
| WM-CO               | -0.40      |

## 1 Concentration of precursors

A general scheme for the catalyzed channels can be expressed as follows.

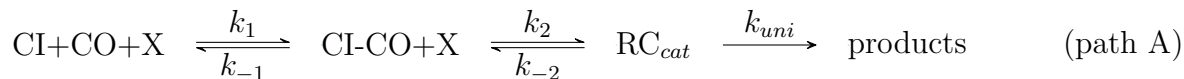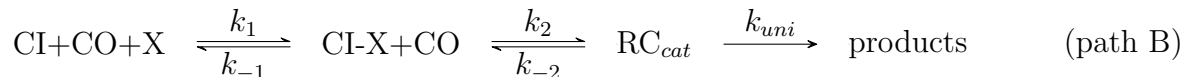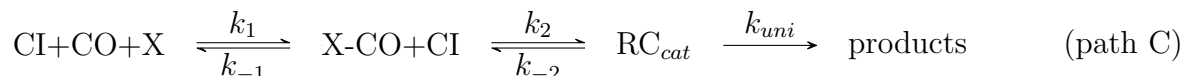

where, CI=CH<sub>2</sub>OO; X= WM and WD (WM=H<sub>2</sub>O and WD= (H<sub>2</sub>O)<sub>2</sub>)

The  $K_{eq1}$  for path A can be expressed as below.

$$K_{eq1}^{pathA} = \frac{[CI - CO]}{[CI][CO]} \quad (1)$$

and

$$[CI - CO] = K_{eq1}^{pathA} [CI][CO] \quad (2)$$

Similarly, the concentration of CI-X and X-CO can be calculated from path B and path C, which can be expressed as below.

$$[CI - X] = K_{eq1}^{pathB} [CI][X] \quad (3)$$

and

$$[X - CO] = K_{eq1}^{pathC} [X][CO] \quad (4)$$

Consequently, the concentration of different precursors molecules has been tabulated in the below Tables.

Table S7: Concentration of different bimolecular species in in molecules  $\text{cm}^{-3}$ , calculated using the  $k_{eq1}$  values of path A, B, and C for  $\text{H}_2\text{O}$  catalyzed channel

| Temp (K) | $k_{eq1}^{pathA}$      | $k_{eq1}^{pathB}$      | $k_{eq1}^{pathC}$      | $[\text{H}_2\text{O}]$ | $[\text{CO}]$         | $[\text{CI}]$      | $[\text{CI-CO}]$      | $[\text{CI-WM}]$   | $[\text{WM-CO}]$   |
|----------|------------------------|------------------------|------------------------|------------------------|-----------------------|--------------------|-----------------------|--------------------|--------------------|
| 280      | $9.67 \times 10^{-25}$ | $4.03 \times 10^{-21}$ | $1.92 \times 10^{-23}$ | $2.58 \times 10^{17}$  | $1.00 \times 10^{13}$ | $5.00 \times 10^4$ | $4.83 \times 10^{-7}$ | $5.20 \times 10^1$ | $4.95 \times 10^7$ |
| 290      | $9.13 \times 10^{-25}$ | $2.64 \times 10^{-21}$ | $1.96 \times 10^{-23}$ | $4.78 \times 10^{17}$  | $1.00 \times 10^{13}$ | $5.00 \times 10^4$ | $4.57 \times 10^{-7}$ | $6.31 \times 10^1$ | $9.36 \times 10^7$ |
| 298      | $8.76 \times 10^{-25}$ | $1.92 \times 10^{-21}$ | $1.99 \times 10^{-23}$ | $7.73 \times 10^{17}$  | $1.00 \times 10^{13}$ | $5.00 \times 10^4$ | $4.38 \times 10^{-7}$ | $7.43 \times 10^1$ | $1.54 \times 10^8$ |
| 300      | $8.68 \times 10^{-25}$ | $1.78 \times 10^{-21}$ | $2.00 \times 10^{-23}$ | $8.58 \times 10^{17}$  | $1.00 \times 10^{13}$ | $5.00 \times 10^4$ | $4.34 \times 10^{-7}$ | $7.64 \times 10^1$ | $1.72 \times 10^8$ |
| 310      | $8.30 \times 10^{-25}$ | $1.24 \times 10^{-21}$ | $2.05 \times 10^{-23}$ | $1.46 \times 10^{18}$  | $1.00 \times 10^{13}$ | $5.00 \times 10^4$ | $4.15 \times 10^{-7}$ | $9.02 \times 10^1$ | $2.99 \times 10^8$ |
| 320      | $7.98 \times 10^{-25}$ | $8.78 \times 10^{-22}$ | $2.10 \times 10^{-23}$ | $2.35 \times 10^{18}$  | $1.00 \times 10^{13}$ | $5.00 \times 10^4$ | $3.99 \times 10^{-7}$ | $1.03 \times 10^2$ | $4.93 \times 10^8$ |

Table S8: Concentration of different bimolecular species in in molecules  $\text{cm}^{-3}$ , calculated using the  $k_{eq1}$  values of path A, B, and C for  $(\text{H}_2\text{O})_2$  catalyzed channel

| Temp (K) | $k_{eq1}^{pathA}$      | $k_{eq1}^{pathB}$      | $k_{eq1}^{pathC}$      | $[\text{H}_2\text{O}]$ | $[\text{CO}]$         | $[\text{CI}]$         | $[\text{CI-CO}]$      | $[\text{CI-WD}]$ | $[\text{WD-CO}]$   |
|----------|------------------------|------------------------|------------------------|------------------------|-----------------------|-----------------------|-----------------------|------------------|--------------------|
| 280      | $9.67 \times 10^{-25}$ | $3.05 \times 10^{-19}$ | $7.95 \times 10^{-24}$ | $5.00 \times 10^4$     | $1.00 \times 10^{13}$ | $2.05 \times 10^{14}$ | $4.83 \times 10^{-7}$ | 3.12             | $1.63 \times 10^4$ |
| 290      | $9.13 \times 10^{-25}$ | $1.42 \times 10^{-19}$ | $6.78 \times 10^{-24}$ | $5.00 \times 10^4$     | $1.00 \times 10^{13}$ | $5.91 \times 10^{14}$ | $4.57 \times 10^{-7}$ | 4.19             | $4.01 \times 10^4$ |
| 298      | $8.76 \times 10^{-25}$ | $7.97 \times 10^{-20}$ | $6.02 \times 10^{-24}$ | $5.00 \times 10^4$     | $1.00 \times 10^{13}$ | $1.36 \times 10^{15}$ | $4.38 \times 10^{-7}$ | 5.42             | $8.19 \times 10^4$ |
| 300      | $8.68 \times 10^{-25}$ | $6.94 \times 10^{-20}$ | $5.85 \times 10^{-24}$ | $5.00 \times 10^4$     | $1.00 \times 10^{13}$ | $1.62 \times 10^{15}$ | $4.34 \times 10^{-7}$ | 5.62             | $9.48 \times 10^4$ |
| 310      | $8.30 \times 10^{-25}$ | $3.56 \times 10^{-20}$ | $5.11 \times 10^{-24}$ | $5.00 \times 10^4$     | $1.00 \times 10^{13}$ | $4.06 \times 10^{15}$ | $4.15 \times 10^{-7}$ | 7.22             | $2.07 \times 10^5$ |
| 320      | $7.98 \times 10^{-25}$ | $1.91 \times 10^{-20}$ | $4.51 \times 10^{-24}$ | $5.00 \times 10^4$     | $1.00 \times 10^{13}$ | $9.04 \times 10^{15}$ | $3.99 \times 10^{-7}$ | 8.62             | $4.08 \times 10^5$ |









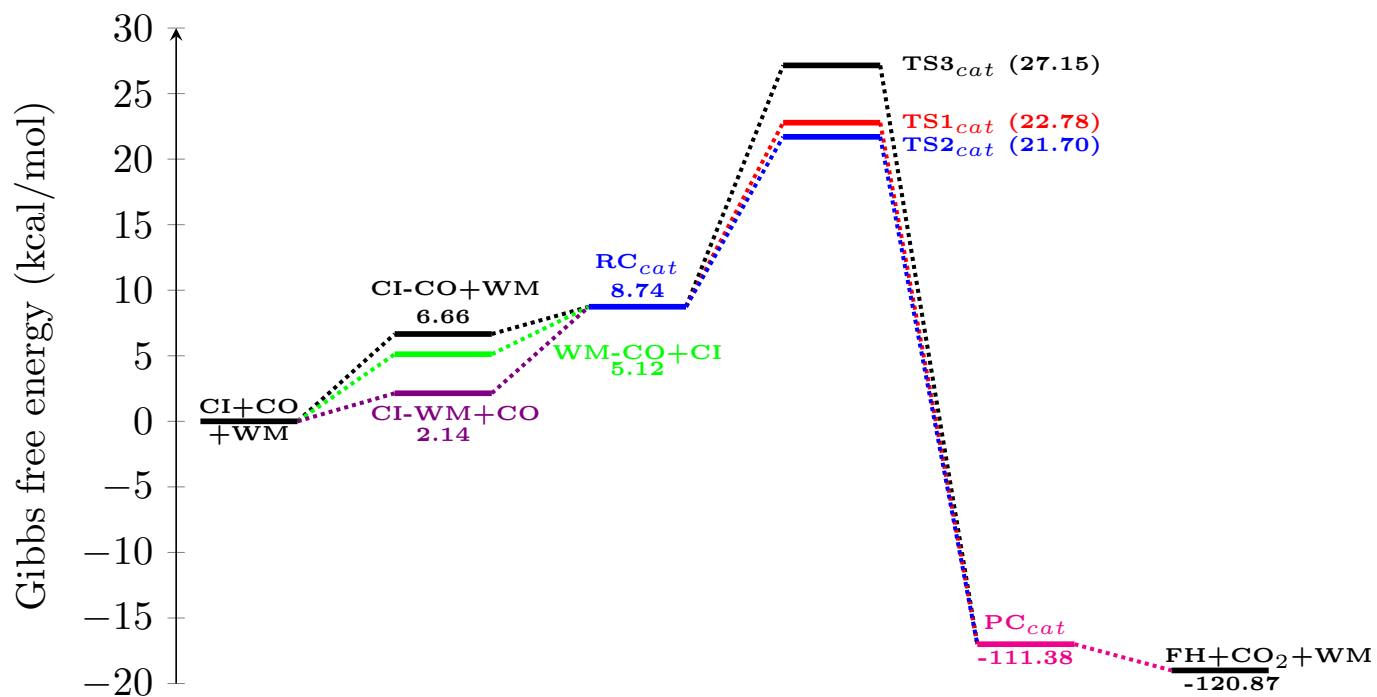

Figure S1: Gibbs free energy profile for  $\text{CH}_2\text{OO} + \text{CO}$  reaction in presence of  $\text{H}_2\text{O}$  calculated at CCSD(T)/CBS//M062X/aug-cc-pVTZ level of theory, where  $\text{CI}=\text{CH}_2\text{OO}$ ,  $\text{FH}=\text{CH}_2\text{O}$ ;  $\text{CI-CO}$ ,  $\text{CI-WM}$  and  $\text{WM-CO}$  are pre-reactive complexes.

Table S12: Bimolecular rate constant  $k_b$  in ( $\text{cm}^3 \text{ molecule}^{-1} \text{ sec}^{-1}$ ) for  $(\text{H}_2\text{O})_2$  catalyzed channel corresponds to TS1 within temperature range 213-1400 K

| Temp (K) | path A                 | path B                 | path C                 | uncat                  |
|----------|------------------------|------------------------|------------------------|------------------------|
| 213      | $5.77 \times 10^{-14}$ | $3.20 \times 10^{-24}$ | $2.94 \times 10^{-17}$ | $3.71 \times 10^{-24}$ |
| 216      | $5.29 \times 10^{-14}$ | $4.51 \times 10^{-24}$ | $3.03 \times 10^{-17}$ | $5.08 \times 10^{-24}$ |
| 219      | $4.87 \times 10^{-14}$ | $6.32 \times 10^{-24}$ | $3.13 \times 10^{-17}$ | $6.89 \times 10^{-24}$ |
| 224      | $4.26 \times 10^{-14}$ | $1.09 \times 10^{-23}$ | $3.28 \times 10^{-17}$ | $1.13 \times 10^{-23}$ |
| 235      | $3.24 \times 10^{-14}$ | $3.31 \times 10^{-23}$ | $3.62 \times 10^{-17}$ | $3.09 \times 10^{-23}$ |
| 250      | $2.32 \times 10^{-14}$ | $1.30 \times 10^{-22}$ | $4.09 \times 10^{-17}$ | $1.07 \times 10^{-22}$ |
| 259      | $1.93 \times 10^{-14}$ | $2.75 \times 10^{-22}$ | $4.37 \times 10^{-17}$ | $2.09 \times 10^{-22}$ |
| 265      | $1.73 \times 10^{-14}$ | $4.41 \times 10^{-22}$ | $4.57 \times 10^{-17}$ | $3.20 \times 10^{-22}$ |
| 278      | $1.37 \times 10^{-14}$ | $1.15 \times 10^{-21}$ | $4.99 \times 10^{-17}$ | $7.58 \times 10^{-22}$ |
| 280      | $1.33 \times 10^{-14}$ | $1.32 \times 10^{-21}$ | $5.06 \times 10^{-17}$ | $8.59 \times 10^{-22}$ |
| 290      | $1.13 \times 10^{-14}$ | $2.58 \times 10^{-21}$ | $5.39 \times 10^{-17}$ | $1.57 \times 10^{-21}$ |
| 298      | $1.01 \times 10^{-14}$ | $4.28 \times 10^{-21}$ | $5.66 \times 10^{-17}$ | $2.48 \times 10^{-21}$ |
| 300      | $9.78 \times 10^{-15}$ | $4.84 \times 10^{-21}$ | $5.73 \times 10^{-17}$ | $2.76 \times 10^{-21}$ |
| 310      | $8.53 \times 10^{-15}$ | $8.72 \times 10^{-21}$ | $6.07 \times 10^{-17}$ | $4.69 \times 10^{-21}$ |
| 320      | $7.52 \times 10^{-15}$ | $1.52 \times 10^{-20}$ | $6.42 \times 10^{-17}$ | $7.72 \times 10^{-21}$ |
| 330      | $6.67 \times 10^{-15}$ | $2.57 \times 10^{-20}$ | $6.77 \times 10^{-17}$ | $1.23 \times 10^{-20}$ |
| 350      | $5.39 \times 10^{-15}$ | $6.72 \times 10^{-20}$ | $7.49 \times 10^{-17}$ | $2.92 \times 10^{-20}$ |
| 375      | $4.28 \times 10^{-15}$ | $1.96 \times 10^{-19}$ | $8.42 \times 10^{-17}$ | $7.60 \times 10^{-20}$ |
| 400      | $3.52 \times 10^{-15}$ | $5.03 \times 10^{-19}$ | $9.40 \times 10^{-17}$ | $1.77 \times 10^{-19}$ |
| 425      | $2.97 \times 10^{-15}$ | $1.17 \times 10^{-18}$ | $1.04 \times 10^{-16}$ | $3.74 \times 10^{-19}$ |
| 450      | $2.58 \times 10^{-15}$ | $2.49 \times 10^{-18}$ | $1.15 \times 10^{-16}$ | $7.33 \times 10^{-19}$ |
| 475      | $2.28 \times 10^{-15}$ | $4.92 \times 10^{-18}$ | $1.26 \times 10^{-16}$ | $1.35 \times 10^{-18}$ |
| 500      | $2.05 \times 10^{-15}$ | $9.16 \times 10^{-18}$ | $1.37 \times 10^{-16}$ | $2.34 \times 10^{-18}$ |
| 550      | $1.72 \times 10^{-15}$ | $2.72 \times 10^{-17}$ | $1.62 \times 10^{-16}$ | $6.15 \times 10^{-18}$ |
| 600      | $1.52 \times 10^{-15}$ | $6.86 \times 10^{-17}$ | $1.89 \times 10^{-16}$ | $1.40 \times 10^{-17}$ |
| 650      | $1.38 \times 10^{-15}$ | $1.52 \times 10^{-16}$ | $2.18 \times 10^{-16}$ | $2.84 \times 10^{-17}$ |
| 700      | $1.29 \times 10^{-15}$ | $3.06 \times 10^{-16}$ | $2.51 \times 10^{-16}$ | $5.29 \times 10^{-17}$ |
| 750      | $1.23 \times 10^{-15}$ | $5.66 \times 10^{-16}$ | $2.86 \times 10^{-16}$ | $9.14 \times 10^{-17}$ |
| 800      | $1.20 \times 10^{-15}$ | $9.80 \times 10^{-16}$ | $3.24 \times 10^{-16}$ | $1.49 \times 10^{-16}$ |
| 850      | $1.17 \times 10^{-15}$ | $1.61 \times 10^{-15}$ | $3.65 \times 10^{-16}$ | $2.32 \times 10^{-16}$ |
| 900      | $1.17 \times 10^{-15}$ | $2.51 \times 10^{-15}$ | $4.10 \times 10^{-16}$ | $3.45 \times 10^{-16}$ |
| 1000     | $1.18 \times 10^{-15}$ | $5.48 \times 10^{-15}$ | $5.10 \times 10^{-16}$ | $6.93 \times 10^{-16}$ |

Table S13: Bimolecular rate constant  $k_b$  in ( $\text{cm}^3 \text{ molecule}^{-1} \text{ sec}^{-1}$ ) for  $(\text{H}_2\text{O})_2$  catalyzed channel corresponds to TS2 within temperature range 213-1400 K

| Temp (K) | path A                 | path B                 | path C                 | uncat                  |
|----------|------------------------|------------------------|------------------------|------------------------|
| 213      | $2.38 \times 10^{-11}$ | $1.32 \times 10^{-21}$ | $1.22 \times 10^{-14}$ | $5.63 \times 10^{-26}$ |
| 216      | $2.01 \times 10^{-11}$ | $1.71 \times 10^{-21}$ | $1.15 \times 10^{-14}$ | $8.57 \times 10^{-26}$ |
| 219      | $1.71 \times 10^{-11}$ | $2.21 \times 10^{-21}$ | $1.09 \times 10^{-14}$ | $1.29 \times 10^{-25}$ |
| 224      | $1.31 \times 10^{-11}$ | $3.34 \times 10^{-21}$ | $1.01 \times 10^{-14}$ | $2.48 \times 10^{-25}$ |
| 235      | $7.64 \times 10^{-12}$ | $7.82 \times 10^{-21}$ | $8.53 \times 10^{-15}$ | $9.60 \times 10^{-25}$ |
| 250      | $3.96 \times 10^{-12}$ | $2.22 \times 10^{-20}$ | $6.98 \times 10^{-15}$ | $5.04 \times 10^{-24}$ |
| 259      | $2.77 \times 10^{-12}$ | $3.94 \times 10^{-20}$ | $6.27 \times 10^{-15}$ | $1.25 \times 10^{-23}$ |
| 265      | $2.22 \times 10^{-12}$ | $5.66 \times 10^{-20}$ | $5.87 \times 10^{-15}$ | $2.21 \times 10^{-23}$ |
| 278      | $1.41 \times 10^{-12}$ | $1.18 \times 10^{-19}$ | $5.14 \times 10^{-15}$ | $7.07 \times 10^{-23}$ |
| 280      | $1.32 \times 10^{-12}$ | $1.31 \times 10^{-19}$ | $5.04 \times 10^{-15}$ | $8.37 \times 10^{-23}$ |
| 290      | $9.69 \times 10^{-13}$ | $2.21 \times 10^{-19}$ | $4.61 \times 10^{-15}$ | $1.89 \times 10^{-22}$ |
| 298      | $7.67 \times 10^{-13}$ | $3.26 \times 10^{-19}$ | $4.32 \times 10^{-15}$ | $3.49 \times 10^{-22}$ |
| 300      | $7.25 \times 10^{-13}$ | $3.59 \times 10^{-19}$ | $4.25 \times 10^{-15}$ | $4.05 \times 10^{-22}$ |
| 310      | $5.54 \times 10^{-13}$ | $5.66 \times 10^{-19}$ | $3.94 \times 10^{-15}$ | $8.30 \times 10^{-22}$ |
| 320      | $4.31 \times 10^{-13}$ | $8.71 \times 10^{-19}$ | $3.68 \times 10^{-15}$ | $1.63 \times 10^{-21}$ |
| 330      | $3.41 \times 10^{-13}$ | $1.31 \times 10^{-18}$ | $3.46 \times 10^{-15}$ | $3.08 \times 10^{-21}$ |
| 350      | $2.23 \times 10^{-13}$ | $2.78 \times 10^{-18}$ | $3.09 \times 10^{-15}$ | $9.91 \times 10^{-21}$ |
| 375      | $1.40 \times 10^{-13}$ | $6.42 \times 10^{-18}$ | $2.76 \times 10^{-15}$ | $3.63 \times 10^{-20}$ |
| 400      | $9.45 \times 10^{-14}$ | $1.35 \times 10^{-17}$ | $2.52 \times 10^{-15}$ | $1.14 \times 10^{-19}$ |
| 425      | $6.71 \times 10^{-14}$ | $2.63 \times 10^{-17}$ | $2.35 \times 10^{-15}$ | $3.18 \times 10^{-19}$ |
| 450      | $4.98 \times 10^{-14}$ | $4.81 \times 10^{-17}$ | $2.21 \times 10^{-15}$ | $7.96 \times 10^{-19}$ |
| 475      | $3.83 \times 10^{-14}$ | $8.29 \times 10^{-17}$ | $2.12 \times 10^{-15}$ | $1.82 \times 10^{-18}$ |
| 500      | $3.05 \times 10^{-14}$ | $1.37 \times 10^{-16}$ | $2.04 \times 10^{-15}$ | $3.87 \times 10^{-18}$ |
| 550      | $2.08 \times 10^{-14}$ | $3.28 \times 10^{-16}$ | $1.96 \times 10^{-15}$ | $1.44 \times 10^{-17}$ |
| 600      | $1.54 \times 10^{-14}$ | $6.97 \times 10^{-16}$ | $1.92 \times 10^{-15}$ | $4.42 \times 10^{-17}$ |
| 650      | $1.22 \times 10^{-14}$ | $1.34 \times 10^{-15}$ | $1.92 \times 10^{-15}$ | $1.16 \times 10^{-16}$ |
| 700      | $1.01 \times 10^{-14}$ | $2.38 \times 10^{-15}$ | $1.95 \times 10^{-15}$ | $2.68 \times 10^{-16}$ |
| 750      | $8.62 \times 10^{-15}$ | $3.96 \times 10^{-15}$ | $2.00 \times 10^{-15}$ | $5.60 \times 10^{-16}$ |
| 800      | $7.63 \times 10^{-15}$ | $6.25 \times 10^{-15}$ | $2.06 \times 10^{-15}$ | $1.08 \times 10^{-15}$ |
| 850      | $6.91 \times 10^{-15}$ | $9.45 \times 10^{-15}$ | $2.15 \times 10^{-15}$ | $1.95 \times 10^{-15}$ |
| 900      | $6.38 \times 10^{-15}$ | $1.38 \times 10^{-14}$ | $2.24 \times 10^{-15}$ | $3.32 \times 10^{-15}$ |
| 1000     | $5.72 \times 10^{-15}$ | $2.66 \times 10^{-14}$ | $2.48 \times 10^{-15}$ | $8.38 \times 10^{-15}$ |

Table S14: Bimolecular rate constant  $k_b$  in ( $\text{cm}^3 \text{ molecule}^{-1} \text{ sec}^{-1}$ ) for  $(\text{H}_2\text{O})_2$  catalyzed channel corresponds to TS3, within temperature range 213-1400 K

| Temp (K) | path A                 | path B                 | path C                 | uncat                  |
|----------|------------------------|------------------------|------------------------|------------------------|
| 213      | $1.77 \times 10^{-18}$ | $9.78 \times 10^{-29}$ | $9.01 \times 10^{-22}$ | $1.14 \times 10^{-27}$ |
| 216      | $1.85 \times 10^{-18}$ | $1.58 \times 10^{-28}$ | $1.06 \times 10^{-21}$ | $1.71 \times 10^{-27}$ |
| 219      | $1.94 \times 10^{-18}$ | $2.52 \times 10^{-28}$ | $1.25 \times 10^{-21}$ | $2.55 \times 10^{-27}$ |
| 224      | $2.09 \times 10^{-18}$ | $5.35 \times 10^{-28}$ | $1.61 \times 10^{-21}$ | $4.81 \times 10^{-27}$ |
| 235      | $2.44 \times 10^{-18}$ | $2.50 \times 10^{-27}$ | $2.73 \times 10^{-21}$ | $1.77 \times 10^{-26}$ |
| 250      | $2.95 \times 10^{-18}$ | $1.66 \times 10^{-26}$ | $5.20 \times 10^{-21}$ | $8.76 \times 10^{-26}$ |
| 259      | $3.27 \times 10^{-18}$ | $4.65 \times 10^{-26}$ | $7.40 \times 10^{-21}$ | $2.09 \times 10^{-25}$ |
| 265      | $3.49 \times 10^{-18}$ | $8.92 \times 10^{-26}$ | $9.24 \times 10^{-21}$ | $3.62 \times 10^{-25}$ |
| 278      | $3.98 \times 10^{-18}$ | $3.33 \times 10^{-25}$ | $1.45 \times 10^{-20}$ | $1.10 \times 10^{-24}$ |
| 280      | $4.06 \times 10^{-18}$ | $4.04 \times 10^{-25}$ | $1.55 \times 10^{-20}$ | $1.29 \times 10^{-24}$ |
| 290      | $4.46 \times 10^{-18}$ | $1.01 \times 10^{-24}$ | $2.12 \times 10^{-20}$ | $2.80 \times 10^{-24}$ |
| 298      | $4.78 \times 10^{-18}$ | $2.03 \times 10^{-24}$ | $2.69 \times 10^{-20}$ | $5.02 \times 10^{-24}$ |
| 300      | $4.87 \times 10^{-18}$ | $2.41 \times 10^{-24}$ | $2.85 \times 10^{-20}$ | $5.78 \times 10^{-24}$ |
| 310      | $5.29 \times 10^{-18}$ | $5.41 \times 10^{-24}$ | $3.76 \times 10^{-20}$ | $1.14 \times 10^{-23}$ |
| 320      | $5.72 \times 10^{-18}$ | $1.16 \times 10^{-23}$ | $4.89 \times 10^{-20}$ | $2.15 \times 10^{-23}$ |
| 330      | $6.16 \times 10^{-18}$ | $2.37 \times 10^{-23}$ | $6.25 \times 10^{-20}$ | $3.93 \times 10^{-23}$ |
| 350      | $7.08 \times 10^{-18}$ | $8.84 \times 10^{-23}$ | $9.85 \times 10^{-20}$ | $1.18 \times 10^{-22}$ |
| 375      | $8.30 \times 10^{-18}$ | $3.80 \times 10^{-22}$ | $1.63 \times 10^{-19}$ | $3.99 \times 10^{-22}$ |
| 400      | $9.58 \times 10^{-18}$ | $1.37 \times 10^{-21}$ | $2.56 \times 10^{-19}$ | $1.16 \times 10^{-21}$ |
| 425      | $1.09 \times 10^{-17}$ | $4.30 \times 10^{-21}$ | $3.83 \times 10^{-19}$ | $3.01 \times 10^{-21}$ |
| 450      | $1.24 \times 10^{-17}$ | $1.19 \times 10^{-20}$ | $5.50 \times 10^{-19}$ | $7.06 \times 10^{-21}$ |
| 475      | $1.39 \times 10^{-17}$ | $3.00 \times 10^{-20}$ | $7.66 \times 10^{-19}$ | $1.52 \times 10^{-20}$ |
| 500      | $1.55 \times 10^{-17}$ | $6.92 \times 10^{-20}$ | $1.04 \times 10^{-18}$ | $3.04 \times 10^{-20}$ |
| 550      | $1.89 \times 10^{-17}$ | $2.98 \times 10^{-19}$ | $1.78 \times 10^{-18}$ | $1.02 \times 10^{-19}$ |
| 600      | $2.27 \times 10^{-17}$ | $1.03 \times 10^{-18}$ | $2.83 \times 10^{-18}$ | $2.86 \times 10^{-19}$ |
| 650      | $2.70 \times 10^{-17}$ | $2.97 \times 10^{-18}$ | $4.26 \times 10^{-18}$ | $6.90 \times 10^{-19}$ |
| 700      | $3.16 \times 10^{-17}$ | $7.48 \times 10^{-18}$ | $6.13 \times 10^{-18}$ | $1.49 \times 10^{-18}$ |
| 750      | $3.67 \times 10^{-17}$ | $1.69 \times 10^{-17}$ | $8.51 \times 10^{-18}$ | $2.93 \times 10^{-18}$ |
| 800      | $4.24 \times 10^{-17}$ | $3.47 \times 10^{-17}$ | $1.15 \times 10^{-17}$ | $5.35 \times 10^{-18}$ |
| 850      | $4.85 \times 10^{-17}$ | $6.63 \times 10^{-17}$ | $1.51 \times 10^{-17}$ | $9.17 \times 10^{-18}$ |
| 900      | $5.52 \times 10^{-17}$ | $1.19 \times 10^{-16}$ | $1.94 \times 10^{-17}$ | $1.49 \times 10^{-17}$ |
| 1000     | $7.03 \times 10^{-17}$ | $3.27 \times 10^{-16}$ | $3.05 \times 10^{-17}$ | $3.49 \times 10^{-17}$ |

Table S15: The total bimolecular rate constant  $k_b$  in ( $\text{cm}^3 \text{ molecule}^{-1} \text{ sec}^{-1}$ ) for  $(\text{H}_2\text{O})_2$  catalyzed and uncatalyzed channel, within the temperature range of 213-1400 K

| Temp (K) | $k_{tot}^{cat}$        | $k_{tot}^{uncat}$      | $k_{tot}$              |
|----------|------------------------|------------------------|------------------------|
| 213      | $2.39 \times 10^{-11}$ | $3.77 \times 10^{-24}$ | $2.39 \times 10^{-11}$ |
| 216      | $2.02 \times 10^{-11}$ | $5.17 \times 10^{-24}$ | $2.02 \times 10^{-11}$ |
| 219      | $1.71 \times 10^{-11}$ | $7.03 \times 10^{-24}$ | $1.71 \times 10^{-11}$ |
| 224      | $1.32 \times 10^{-11}$ | $1.15 \times 10^{-23}$ | $1.32 \times 10^{-11}$ |
| 235      | $7.68 \times 10^{-12}$ | $3.19 \times 10^{-23}$ | $7.68 \times 10^{-12}$ |
| 250      | $3.99 \times 10^{-12}$ | $1.12 \times 10^{-22}$ | $3.99 \times 10^{-12}$ |
| 259      | $2.80 \times 10^{-12}$ | $2.22 \times 10^{-22}$ | $2.80 \times 10^{-12}$ |
| 265      | $2.24 \times 10^{-12}$ | $3.43 \times 10^{-22}$ | $2.24 \times 10^{-12}$ |
| 278      | $1.43 \times 10^{-12}$ | $8.30 \times 10^{-22}$ | $1.43 \times 10^{-12}$ |
| 280      | $1.34 \times 10^{-12}$ | $9.44 \times 10^{-22}$ | $1.34 \times 10^{-12}$ |
| 290      | $9.85 \times 10^{-13}$ | $1.76 \times 10^{-21}$ | $9.85 \times 10^{-13}$ |
| 298      | $7.82 \times 10^{-13}$ | $2.83 \times 10^{-21}$ | $7.82 \times 10^{-13}$ |
| 300      | $7.39 \times 10^{-13}$ | $3.17 \times 10^{-21}$ | $7.39 \times 10^{-13}$ |
| 310      | $5.66 \times 10^{-13}$ | $5.53 \times 10^{-21}$ | $5.66 \times 10^{-13}$ |
| 320      | $4.42 \times 10^{-13}$ | $9.37 \times 10^{-21}$ | $4.42 \times 10^{-13}$ |
| 330      | $3.51 \times 10^{-13}$ | $1.55 \times 10^{-20}$ | $3.51 \times 10^{-13}$ |
| 350      | $2.31 \times 10^{-13}$ | $3.93 \times 10^{-20}$ | $2.31 \times 10^{-13}$ |
| 375      | $1.48 \times 10^{-13}$ | $1.13 \times 10^{-19}$ | $1.48 \times 10^{-13}$ |
| 400      | $1.01 \times 10^{-13}$ | $2.92 \times 10^{-19}$ | $1.01 \times 10^{-13}$ |
| 425      | $7.25 \times 10^{-14}$ | $6.95 \times 10^{-19}$ | $7.25 \times 10^{-14}$ |
| 450      | $5.47 \times 10^{-14}$ | $1.54 \times 10^{-18}$ | $5.47 \times 10^{-14}$ |
| 475      | $4.30 \times 10^{-14}$ | $3.18 \times 10^{-18}$ | $4.30 \times 10^{-14}$ |
| 500      | $3.49 \times 10^{-14}$ | $6.24 \times 10^{-18}$ | $3.49 \times 10^{-14}$ |
| 550      | $2.50 \times 10^{-14}$ | $2.07 \times 10^{-17}$ | $2.51 \times 10^{-14}$ |
| 600      | $1.99 \times 10^{-14}$ | $5.84 \times 10^{-17}$ | $1.99 \times 10^{-14}$ |
| 650      | $1.72 \times 10^{-14}$ | $1.45 \times 10^{-16}$ | $1.74 \times 10^{-14}$ |
| 700      | $1.63 \times 10^{-14}$ | $3.22 \times 10^{-16}$ | $1.66 \times 10^{-14}$ |
| 750      | $1.67 \times 10^{-14}$ | $6.55 \times 10^{-16}$ | $1.74 \times 10^{-14}$ |
| 800      | $1.85 \times 10^{-14}$ | $1.24 \times 10^{-15}$ | $1.98 \times 10^{-14}$ |
| 850      | $2.18 \times 10^{-14}$ | $2.19 \times 10^{-15}$ | $2.40 \times 10^{-14}$ |
| 900      | $2.67 \times 10^{-14}$ | $3.68 \times 10^{-15}$ | $3.03 \times 10^{-14}$ |
| 1000     | $4.24 \times 10^{-14}$ | $9.11 \times 10^{-15}$ | $5.15 \times 10^{-14}$ |

Table S16: Relative energies ( $\Delta E$ ) including ZPE in kcal mol<sup>1</sup> for all the species with respect to the isolated reactants at the CCSD(T)/CBS level of theory in the presence of (H<sub>2</sub>O)<sub>2</sub> as a catalyst.

| Species             | $\Delta E$ |
|---------------------|------------|
| CI-CO               | -1.48      |
| PC <sub>uncat</sub> | -121.43    |
| RC <sub>cat</sub>   | -13.42     |
| TS1 <sub>cat</sub>  | -0.74      |
| TS2 <sub>cat</sub>  | -3.21      |
| TS3 <sub>cat</sub>  | 3.54       |
| PC <sub>cat</sub>   | -128.84    |
| Product             | -119.22    |
| CI-WD               | -11.84     |
| WD-CO               | - 1.84     |

Table S17: Termolecular rate constant  $k_t$  in ( $\text{cm}^6 \text{ molecule}^{-2} \text{ sec}^{-1}$ ) for  $(\text{H}_2\text{O})_2$  catalyzed channel corresponds to TS1 within the temperature range of 213-1400K

| Temp (K) | PATH A                 |                        |                        | PATH B                 |                        |                        | PATH C                 |                        |                       |                        |
|----------|------------------------|------------------------|------------------------|------------------------|------------------------|------------------------|------------------------|------------------------|-----------------------|------------------------|
|          | keq1                   | keq2                   | kt                     | keq1                   | keq2                   | kt                     | keq1                   | keq2                   | kt                    |                        |
| 213      | $1.80 \times 10^{-24}$ | $8.52 \times 10^{-13}$ | $1.04 \times 10^{-37}$ | $3.43 \times 10^{-16}$ | $4.72 \times 10^{-23}$ | $1.04 \times 10^{-37}$ | $3.72 \times 10^{-23}$ | $4.35 \times 10^{-16}$ | $6.77 \times 10^{-2}$ | $1.04 \times 10^{-37}$ |
| 216      | $1.73 \times 10^{-24}$ | $5.17 \times 10^{-13}$ | $9.17 \times 10^{-38}$ | $2.28 \times 10^{-16}$ | $4.41 \times 10^{-23}$ | $9.17 \times 10^{-38}$ | $3.39 \times 10^{-23}$ | $2.97 \times 10^{-16}$ | $1.02 \times 10^{-1}$ | $9.17 \times 10^{-38}$ |
| 219      | $1.67 \times 10^{-24}$ | $3.18 \times 10^{-13}$ | $8.12 \times 10^{-38}$ | $1.53 \times 10^{-16}$ | $4.13 \times 10^{-23}$ | $1.53 \times 10^{-38}$ | $3.10 \times 10^{-23}$ | $2.04 \times 10^{-16}$ | $1.53 \times 10^{-1}$ | $8.12 \times 10^{-38}$ |
| 224      | $1.57 \times 10^{-24}$ | $1.46 \times 10^{-13}$ | $6.67 \times 10^{-38}$ | $8.09 \times 10^{-17}$ | $3.73 \times 10^{-23}$ | $6.67 \times 10^{-38}$ | $2.69 \times 10^{-23}$ | $1.12 \times 10^{-16}$ | $2.92 \times 10^{-1}$ | $6.67 \times 10^{-38}$ |
| 235      | $1.39 \times 10^{-24}$ | $2.95 \times 10^{-14}$ | $4.49 \times 10^{-38}$ | $2.19 \times 10^{-17}$ | $3.02 \times 10^{-23}$ | $4.49 \times 10^{-38}$ | $2.00 \times 10^{-23}$ | $3.30 \times 10^{-17}$ | 1.10                  | $4.49 \times 10^{-38}$ |
| 250      | $1.20 \times 10^{-24}$ | $4.20 \times 10^{-15}$ | $2.79 \times 10^{-38}$ | $4.43 \times 10^{-18}$ | $2.36 \times 10^{-23}$ | $2.79 \times 10^{-38}$ | $1.41 \times 10^{-23}$ | $7.40 \times 10^{-18}$ | 5.52                  | $2.79 \times 10^{-38}$ |
| 259      | $1.12 \times 10^{-24}$ | $1.45 \times 10^{-15}$ | $2.16 \times 10^{-38}$ | $1.86 \times 10^{-18}$ | $2.07 \times 10^{-23}$ | $2.16 \times 10^{-38}$ | $1.17 \times 10^{-23}$ | $3.29 \times 10^{-18}$ | $1.33 \times 10^1$    | $2.16 \times 10^{-38}$ |
| 265      | $1.07 \times 10^{-24}$ | $7.47 \times 10^{-16}$ | $1.84 \times 10^{-38}$ | $1.08 \times 10^{-18}$ | $1.91 \times 10^{-23}$ | $1.84 \times 10^{-38}$ | $1.04 \times 10^{-23}$ | $1.98 \times 10^{-18}$ | $2.31 \times 10^1$    | $1.84 \times 10^{-38}$ |
| 278      | $9.78 \times 10^{-25}$ | $1.95 \times 10^{-16}$ | $1.34 \times 10^{-38}$ | $3.58 \times 10^{-19}$ | $1.63 \times 10^{-23}$ | $1.34 \times 10^{-38}$ | $8.22 \times 10^{-24}$ | $7.09 \times 10^{-19}$ | $7.04 \times 10^1$    | $1.34 \times 10^{-38}$ |
| 280      | $9.67 \times 10^{-25}$ | $1.60 \times 10^{-16}$ | $1.28 \times 10^{-38}$ | $3.05 \times 10^{-19}$ | $1.59 \times 10^{-23}$ | $1.28 \times 10^{-38}$ | $7.95 \times 10^{-24}$ | $6.11 \times 10^{-19}$ | $8.28 \times 10^1$    | $1.28 \times 10^{-38}$ |
| 290      | $9.13 \times 10^{-25}$ | $6.29 \times 10^{-17}$ | $1.03 \times 10^{-38}$ | $1.42 \times 10^{-19}$ | $1.43 \times 10^{-23}$ | $1.03 \times 10^{-38}$ | $6.78 \times 10^{-24}$ | $2.99 \times 10^{-19}$ | $1.80 \times 10^2$    | $1.03 \times 10^{-38}$ |
| 298      | $8.76 \times 10^{-25}$ | $3.12 \times 10^{-17}$ | $8.82 \times 10^{-39}$ | $7.97 \times 10^{-20}$ | $1.33 \times 10^{-23}$ | $8.82 \times 10^{-39}$ | $6.02 \times 10^{-24}$ | $1.75 \times 10^{-19}$ | $3.23 \times 10^2$    | $8.82 \times 10^{-39}$ |
| 300      | $8.68 \times 10^{-25}$ | $2.63 \times 10^{-17}$ | $8.49 \times 10^{-39}$ | $6.94 \times 10^{-20}$ | $1.30 \times 10^{-23}$ | $8.49 \times 10^{-39}$ | $5.85 \times 10^{-24}$ | $1.54 \times 10^{-19}$ | $3.72 \times 10^2$    | $8.49 \times 10^{-39}$ |
| 310      | $8.30 \times 10^{-25}$ | $1.17 \times 10^{-17}$ | $7.08 \times 10^{-39}$ | $3.56 \times 10^{-20}$ | $1.19 \times 10^{-23}$ | $7.08 \times 10^{-39}$ | $5.11 \times 10^{-24}$ | $8.30 \times 10^{-20}$ | $7.32 \times 10^2$    | $7.08 \times 10^{-39}$ |
| 320      | $7.98 \times 10^{-25}$ | $5.44 \times 10^{-18}$ | $6.00 \times 10^{-39}$ | $1.91 \times 10^{-20}$ | $1.10 \times 10^{-23}$ | $6.00 \times 10^{-39}$ | $4.51 \times 10^{-24}$ | $4.65 \times 10^{-20}$ | $1.38 \times 10^3$    | $6.00 \times 10^{-39}$ |
| 330      | $7.70 \times 10^{-25}$ | $2.66 \times 10^{-18}$ | $5.14 \times 10^{-39}$ | $1.06 \times 10^{-20}$ | $1.02 \times 10^{-23}$ | $5.14 \times 10^{-39}$ | $4.02 \times 10^{-24}$ | $2.70 \times 10^{-20}$ | $2.51 \times 10^3$    | $5.14 \times 10^{-39}$ |
| 350      | $7.27 \times 10^{-25}$ | $7.24 \times 10^{-19}$ | $3.92 \times 10^{-39}$ | $3.65 \times 10^{-21}$ | $9.03 \times 10^{-24}$ | $3.92 \times 10^{-39}$ | $3.27 \times 10^{-24}$ | $1.01 \times 10^{-20}$ | $7.44 \times 10^3$    | $3.92 \times 10^{-39}$ |
| 375      | $6.89 \times 10^{-25}$ | $1.74 \times 10^{-19}$ | $2.95 \times 10^{-39}$ | $1.13 \times 10^{-21}$ | $7.95 \times 10^{-24}$ | $2.95 \times 10^{-39}$ | $2.64 \times 10^{-24}$ | $3.42 \times 10^{-21}$ | $2.46 \times 10^4$    | $2.95 \times 10^{-39}$ |
| 400      | $6.63 \times 10^{-25}$ | $5.02 \times 10^{-20}$ | $2.33 \times 10^{-39}$ | $4.11 \times 10^{-22}$ | $7.19 \times 10^{-24}$ | $2.33 \times 10^{-39}$ | $2.20 \times 10^{-24}$ | $1.34 \times 10^{-21}$ | $7.00 \times 10^4$    | $2.33 \times 10^{-39}$ |
| 425      | $6.48 \times 10^{-25}$ | $1.69 \times 10^{-20}$ | $1.93 \times 10^{-39}$ | $1.68 \times 10^{-22}$ | $6.64 \times 10^{-24}$ | $1.93 \times 10^{-39}$ | $1.89 \times 10^{-24}$ | $5.92 \times 10^{-22}$ | $1.76 \times 10^5$    | $1.93 \times 10^{-39}$ |
| 450      | $6.39 \times 10^{-25}$ | $6.46 \times 10^{-21}$ | $1.65 \times 10^{-39}$ | $7.67 \times 10^{-23}$ | $6.24 \times 10^{-24}$ | $1.65 \times 10^{-39}$ | $1.66 \times 10^{-24}$ | $2.88 \times 10^{-22}$ | $3.99 \times 10^5$    | $1.65 \times 10^{-39}$ |
| 475      | $6.35 \times 10^{-25}$ | $2.75 \times 10^{-21}$ | $1.45 \times 10^{-39}$ | $3.82 \times 10^{-23}$ | $5.95 \times 10^{-24}$ | $1.45 \times 10^{-39}$ | $1.50 \times 10^{-24}$ | $1.52 \times 10^{-22}$ | $8.28 \times 10^5$    | $1.45 \times 10^{-39}$ |
| 500      | $6.36 \times 10^{-25}$ | $1.28 \times 10^{-21}$ | $1.30 \times 10^{-39}$ | $2.05 \times 10^{-23}$ | $5.73 \times 10^{-24}$ | $1.30 \times 10^{-39}$ | $1.37 \times 10^{-24}$ | $8.58 \times 10^{-23}$ | $1.60 \times 10^6$    | $1.30 \times 10^{-39}$ |
| 550      | $6.49 \times 10^{-25}$ | $3.47 \times 10^{-22}$ | $1.12 \times 10^{-39}$ | $7.06 \times 10^{-24}$ | $5.47 \times 10^{-24}$ | $1.12 \times 10^{-39}$ | $1.19 \times 10^{-24}$ | $3.26 \times 10^{-23}$ | $4.97 \times 10^6$    | $1.12 \times 10^{-39}$ |
| 600      | $6.71 \times 10^{-25}$ | $1.19 \times 10^{-22}$ | $1.02 \times 10^{-39}$ | $2.95 \times 10^{-24}$ | $5.37 \times 10^{-24}$ | $1.02 \times 10^{-39}$ | $1.07 \times 10^{-24}$ | $1.48 \times 10^{-23}$ | $1.28 \times 10^7$    | $1.02 \times 10^{-39}$ |
| 650      | $7.02 \times 10^{-25}$ | $4.88 \times 10^{-23}$ | $9.71\text{E-}40$      | $1.43 \times 10^{-24}$ | $5.37 \times 10^{-24}$ | $9.71\text{E-}40$      | $1.00 \times 10^{-24}$ | $7.70 \times 10^{-24}$ | $2.84 \times 10^7$    | $9.71\text{E-}40$      |
| 700      | $7.39 \times 10^{-25}$ | $2.30 \times 10^{-23}$ | $9.56\text{E-}40$      | $7.82 \times 10^{-25}$ | $5.45 \times 10^{-24}$ | $9.56\text{E-}40$      | $9.54 \times 10^{-25}$ | $4.46 \times 10^{-24}$ | $5.61 \times 10^7$    | $9.56\text{E-}40$      |
| 750      | $7.82 \times 10^{-25}$ | $1.22 \times 10^{-23}$ | $9.64\text{E-}40$      | $4.68 \times 10^{-25}$ | $5.58 \times 10^{-24}$ | $9.64\text{E-}40$      | $9.27 \times 10^{-25}$ | $2.82 \times 10^{-24}$ | $1.01 \times 10^8$    | $9.64\text{E-}40$      |
| 800      | $8.30 \times 10^{-25}$ | $7.03 \times 10^{-24}$ | $9.93\text{E-}40$      | $3.01 \times 10^{-25}$ | $5.76 \times 10^{-24}$ | $9.93\text{E-}40$      | $9.13 \times 10^{-25}$ | $1.90 \times 10^{-24}$ | $1.70 \times 10^8$    | $9.93\text{E-}40$      |
| 850      | $8.83 \times 10^{-25}$ | $4.38 \times 10^{-24}$ | $1.04 \times 10^{-39}$ | $2.07 \times 10^{-25}$ | $5.98 \times 10^{-24}$ | $1.04 \times 10^{-39}$ | $9.09 \times 10^{-25}$ | $1.36 \times 10^{-24}$ | $2.68 \times 10^8$    | $1.04 \times 10^{-39}$ |
| 900      | $9.41 \times 10^{-25}$ | $2.90 \times 10^{-24}$ | $1.10 \times 10^{-39}$ | $1.49 \times 10^{-25}$ | $6.24 \times 10^{-24}$ | $1.10 \times 10^{-39}$ | $9.12 \times 10^{-25}$ | $1.02 \times 10^{-24}$ | $4.03 \times 10^8$    | $1.10 \times 10^{-39}$ |
| 1000     | $1.07 \times 10^{-24}$ | $1.47 \times 10^{-24}$ | $1.26 \times 10^{-39}$ | $8.72 \times 10^{-26}$ | $6.84 \times 10^{-24}$ | $1.26 \times 10^{-39}$ | $9.36 \times 10^{-25}$ | $6.37 \times 10^{-25}$ | $8.01 \times 10^8$    | $1.26 \times 10^{-39}$ |

Table S18: Termolecular rate constant  $k_t$  in ( $\text{cm}^6 \text{ molecule}^{-2} \text{ sec}^{-1}$ ) for  $(\text{H}_2\text{O})_2$  catalyzed channel corresponds to TS2 within the temperature range of 213-1400K

| Temp (K) | PATH A                 |                        |                      |                        | PATH B                 |                        |                      |                        | PATH C                 |                        |                      |                        |
|----------|------------------------|------------------------|----------------------|------------------------|------------------------|------------------------|----------------------|------------------------|------------------------|------------------------|----------------------|------------------------|
|          | keq1                   | keq2                   | kumi                 | kt                     | keq1                   | keq2                   | kumi                 | kt                     | keq1                   | keq2                   | kumi                 | kt                     |
| 213      | 1.80×10 <sup>-24</sup> | 8.52×10 <sup>-13</sup> | 2.79×10 <sup>1</sup> | 4.29×10 <sup>-35</sup> | 3.43×10 <sup>-16</sup> | 4.72×10 <sup>-23</sup> | 2.79×10 <sup>1</sup> | 4.29×10 <sup>-35</sup> | 3.72×10 <sup>-23</sup> | 4.35×10 <sup>-16</sup> | 2.79×10 <sup>1</sup> | 4.29×10 <sup>-35</sup> |
| 216      | 1.73×10 <sup>-24</sup> | 5.17×10 <sup>-13</sup> | 3.89×10 <sup>1</sup> | 3.48×10 <sup>-35</sup> | 2.28×10 <sup>-16</sup> | 4.41×10 <sup>-23</sup> | 3.89×10 <sup>1</sup> | 3.48×10 <sup>-35</sup> | 3.39×10 <sup>-23</sup> | 2.97×10 <sup>-16</sup> | 3.89×10 <sup>1</sup> | 3.48×10 <sup>-35</sup> |
| 219      | 1.67×10 <sup>-24</sup> | 3.18×10 <sup>-13</sup> | 5.36×10 <sup>1</sup> | 2.84×10 <sup>-35</sup> | 1.53×10 <sup>-16</sup> | 4.13×10 <sup>-23</sup> | 5.36×10 <sup>1</sup> | 2.84×10 <sup>-35</sup> | 3.10×10 <sup>-23</sup> | 2.04×10 <sup>-16</sup> | 5.36×10 <sup>1</sup> | 2.84×10 <sup>-35</sup> |
| 224      | 1.57×10 <sup>-24</sup> | 1.46×10 <sup>-13</sup> | 8.98×10 <sup>1</sup> | 2.05×10 <sup>-35</sup> | 8.09×10 <sup>-17</sup> | 3.73×10 <sup>-23</sup> | 8.98×10 <sup>1</sup> | 2.05×10 <sup>-35</sup> | 2.69×10 <sup>-23</sup> | 1.12×10 <sup>-16</sup> | 8.98×10 <sup>1</sup> | 2.05×10 <sup>-35</sup> |
| 235      | 1.39×10 <sup>-24</sup> | 2.95×10 <sup>-14</sup> | 2.59×10 <sup>2</sup> | 1.06×10 <sup>-35</sup> | 2.19×10 <sup>-17</sup> | 3.02×10 <sup>-23</sup> | 2.59×10 <sup>2</sup> | 1.06×10 <sup>-35</sup> | 2.00×10 <sup>-23</sup> | 3.30×10 <sup>-17</sup> | 2.59×10 <sup>2</sup> | 1.06×10 <sup>-35</sup> |
| 250      | 1.20×10 <sup>-24</sup> | 4.20×10 <sup>-15</sup> | 9.43×10 <sup>2</sup> | 4.76×10 <sup>-36</sup> | 4.43×10 <sup>-18</sup> | 2.36×10 <sup>-23</sup> | 9.43×10 <sup>2</sup> | 4.76×10 <sup>-36</sup> | 1.41×10 <sup>-23</sup> | 7.40×10 <sup>-18</sup> | 9.43×10 <sup>2</sup> | 4.76×10 <sup>-36</sup> |
| 259      | 1.12×10 <sup>-24</sup> | 1.45×10 <sup>-15</sup> | 1.91×10 <sup>3</sup> | 3.09×10 <sup>-36</sup> | 1.86×10 <sup>-18</sup> | 2.07×10 <sup>-23</sup> | 1.91×10 <sup>3</sup> | 3.09×10 <sup>-36</sup> | 1.17×10 <sup>-23</sup> | 3.29×10 <sup>-18</sup> | 1.91×10 <sup>3</sup> | 3.09×10 <sup>-36</sup> |
| 265      | 1.07×10 <sup>-24</sup> | 7.47×10 <sup>-16</sup> | 2.97×10 <sup>3</sup> | 2.36×10 <sup>-36</sup> | 1.08×10 <sup>-18</sup> | 1.91×10 <sup>-23</sup> | 2.97×10 <sup>3</sup> | 2.36×10 <sup>-36</sup> | 1.04×10 <sup>-23</sup> | 1.98×10 <sup>-18</sup> | 2.97×10 <sup>3</sup> | 2.36×10 <sup>-36</sup> |
| 278      | 9.78×10 <sup>-25</sup> | 1.95×10 <sup>-16</sup> | 7.25×10 <sup>3</sup> | 1.38×10 <sup>-36</sup> | 3.58×10 <sup>-19</sup> | 1.63×10 <sup>-23</sup> | 7.25×10 <sup>3</sup> | 1.38×10 <sup>-36</sup> | 8.22×10 <sup>-24</sup> | 7.09×10 <sup>-19</sup> | 7.25×10 <sup>3</sup> | 1.38×10 <sup>-36</sup> |
| 280      | 9.67×10 <sup>-25</sup> | 1.60×10 <sup>-16</sup> | 8.25×10 <sup>3</sup> | 1.28×10 <sup>-36</sup> | 3.05×10 <sup>-19</sup> | 1.59×10 <sup>-23</sup> | 8.25×10 <sup>3</sup> | 1.28×10 <sup>-36</sup> | 7.95×10 <sup>-24</sup> | 6.11×10 <sup>-19</sup> | 8.25×10 <sup>3</sup> | 1.28×10 <sup>-36</sup> |
| 290      | 9.13×10 <sup>-25</sup> | 6.29×10 <sup>-17</sup> | 1.54×10 <sup>4</sup> | 8.85×10 <sup>-37</sup> | 1.42×10 <sup>-19</sup> | 1.43×10 <sup>-23</sup> | 1.54×10 <sup>4</sup> | 8.85×10 <sup>-37</sup> | 6.78×10 <sup>-24</sup> | 2.99×10 <sup>-19</sup> | 1.54×10 <sup>4</sup> | 8.85×10 <sup>-37</sup> |
| 298      | 8.76×10 <sup>-25</sup> | 3.12×10 <sup>-17</sup> | 2.46×10 <sup>4</sup> | 6.72×10 <sup>-37</sup> | 7.97×10 <sup>-20</sup> | 1.33×10 <sup>-23</sup> | 2.46×10 <sup>4</sup> | 6.72×10 <sup>-37</sup> | 6.02×10 <sup>-24</sup> | 1.75×10 <sup>-19</sup> | 2.46×10 <sup>4</sup> | 6.72×10 <sup>-37</sup> |
| 300      | 8.68×10 <sup>-25</sup> | 2.63×10 <sup>-17</sup> | 2.76×10 <sup>4</sup> | 6.30×10 <sup>-37</sup> | 6.94×10 <sup>-20</sup> | 1.30×10 <sup>-23</sup> | 2.76×10 <sup>4</sup> | 6.30×10 <sup>-37</sup> | 5.85×10 <sup>-24</sup> | 1.54×10 <sup>-19</sup> | 2.76×10 <sup>4</sup> | 6.30×10 <sup>-37</sup> |
| 310      | 8.30×10 <sup>-25</sup> | 1.17×10 <sup>-17</sup> | 4.75×10 <sup>4</sup> | 4.60×10 <sup>-37</sup> | 3.56×10 <sup>-20</sup> | 1.19×10 <sup>-23</sup> | 4.75×10 <sup>4</sup> | 4.60×10 <sup>-37</sup> | 5.11×10 <sup>-24</sup> | 8.30×10 <sup>-20</sup> | 4.75×10 <sup>4</sup> | 4.60×10 <sup>-37</sup> |
| 320      | 7.98×10 <sup>-25</sup> | 5.44×10 <sup>-18</sup> | 7.92×10 <sup>4</sup> | 3.44×10 <sup>-37</sup> | 1.91×10 <sup>-20</sup> | 1.10×10 <sup>-23</sup> | 7.92×10 <sup>4</sup> | 3.44×10 <sup>-37</sup> | 4.51×10 <sup>-24</sup> | 4.65×10 <sup>-20</sup> | 7.92×10 <sup>4</sup> | 3.44×10 <sup>-37</sup> |
| 330      | 7.70×10 <sup>-25</sup> | 2.66×10 <sup>-18</sup> | 1.28×10 <sup>5</sup> | 2.62×10 <sup>-37</sup> | 1.06×10 <sup>-20</sup> | 1.02×10 <sup>-23</sup> | 1.28×10 <sup>5</sup> | 2.62×10 <sup>-37</sup> | 4.02×10 <sup>-24</sup> | 2.70×10 <sup>-20</sup> | 1.28×10 <sup>5</sup> | 2.62×10 <sup>-37</sup> |
| 350      | 7.27×10 <sup>-25</sup> | 7.24×10 <sup>-19</sup> | 3.08×10 <sup>5</sup> | 1.62×10 <sup>-38</sup> | 3.65×10 <sup>-21</sup> | 9.03×10 <sup>-24</sup> | 3.08×10 <sup>5</sup> | 1.62×10 <sup>-38</sup> | 3.27×10 <sup>-24</sup> | 1.01×10 <sup>-20</sup> | 3.08×10 <sup>5</sup> | 1.62×10 <sup>-38</sup> |
| 375      | 6.89×10 <sup>-25</sup> | 1.74×10 <sup>-19</sup> | 8.08×10 <sup>5</sup> | 9.67×10 <sup>-38</sup> | 1.13×10 <sup>-21</sup> | 7.95×10 <sup>-24</sup> | 8.08×10 <sup>5</sup> | 9.67×10 <sup>-38</sup> | 2.64×10 <sup>-24</sup> | 3.42×10 <sup>-21</sup> | 8.08×10 <sup>5</sup> | 9.67×10 <sup>-38</sup> |
| 400      | 6.63×10 <sup>-25</sup> | 5.02×10 <sup>-20</sup> | 1.88×10 <sup>6</sup> | 6.27×10 <sup>-38</sup> | 4.11×10 <sup>-22</sup> | 7.19×10 <sup>-24</sup> | 1.88×10 <sup>6</sup> | 6.27×10 <sup>-38</sup> | 2.20×10 <sup>-24</sup> | 1.34×10 <sup>-21</sup> | 1.88×10 <sup>6</sup> | 6.27×10 <sup>-38</sup> |
| 425      | 6.48×10 <sup>-25</sup> | 1.69×10 <sup>-20</sup> | 3.97×10 <sup>6</sup> | 4.34×10 <sup>-38</sup> | 1.68×10 <sup>-22</sup> | 6.64×10 <sup>-24</sup> | 3.97×10 <sup>6</sup> | 4.34×10 <sup>-38</sup> | 1.89×10 <sup>-24</sup> | 5.92×10 <sup>-22</sup> | 3.97×10 <sup>6</sup> | 4.34×10 <sup>-38</sup> |
| 450      | 6.39×10 <sup>-25</sup> | 6.46×10 <sup>-21</sup> | 7.70×10 <sup>6</sup> | 3.18×10 <sup>-38</sup> | 7.67×10 <sup>-23</sup> | 6.24×10 <sup>-24</sup> | 7.70×10 <sup>6</sup> | 3.18×10 <sup>-38</sup> | 1.66×10 <sup>-24</sup> | 2.88×10 <sup>-22</sup> | 7.70×10 <sup>6</sup> | 3.18×10 <sup>-38</sup> |
| 475      | 6.35×10 <sup>-25</sup> | 2.75×10 <sup>-21</sup> | 1.40×10 <sup>7</sup> | 2.44×10 <sup>-38</sup> | 3.82×10 <sup>-23</sup> | 5.95×10 <sup>-24</sup> | 1.40×10 <sup>7</sup> | 2.44×10 <sup>-38</sup> | 1.50×10 <sup>-24</sup> | 1.52×10 <sup>-22</sup> | 1.40×10 <sup>7</sup> | 2.44×10 <sup>-38</sup> |
| 500      | 6.36×10 <sup>-25</sup> | 1.28×10 <sup>-21</sup> | 2.38×10 <sup>7</sup> | 1.94×10 <sup>-38</sup> | 2.05×10 <sup>-23</sup> | 5.73×10 <sup>-24</sup> | 2.38×10 <sup>7</sup> | 1.94×10 <sup>-38</sup> | 1.37×10 <sup>-24</sup> | 8.58×10 <sup>-23</sup> | 2.38×10 <sup>7</sup> | 1.94×10 <sup>-38</sup> |
| 550      | 6.49×10 <sup>-25</sup> | 3.47×10 <sup>-22</sup> | 6.00×10 <sup>7</sup> | 1.35×10 <sup>-38</sup> | 7.06×10 <sup>-24</sup> | 5.47×10 <sup>-24</sup> | 6.00×10 <sup>7</sup> | 1.35×10 <sup>-38</sup> | 1.19×10 <sup>-24</sup> | 3.26×10 <sup>-23</sup> | 6.00×10 <sup>7</sup> | 1.35×10 <sup>-38</sup> |
| 600      | 6.71×10 <sup>-25</sup> | 1.19×10 <sup>-22</sup> | 1.30×10 <sup>8</sup> | 1.04×10 <sup>-38</sup> | 2.95×10 <sup>-24</sup> | 5.37×10 <sup>-24</sup> | 1.30×10 <sup>8</sup> | 1.04×10 <sup>-38</sup> | 1.07×10 <sup>-24</sup> | 1.48×10 <sup>-23</sup> | 1.30×10 <sup>8</sup> | 1.04×10 <sup>-38</sup> |
| 650      | 7.02×10 <sup>-25</sup> | 4.88×10 <sup>-23</sup> | 2.49×10 <sup>8</sup> | 8.53×10 <sup>-39</sup> | 1.43×10 <sup>-24</sup> | 5.37×10 <sup>-24</sup> | 2.49×10 <sup>8</sup> | 8.53×10 <sup>-39</sup> | 1.00×10 <sup>-24</sup> | 7.70×10 <sup>-24</sup> | 2.49×10 <sup>8</sup> | 8.53×10 <sup>-39</sup> |
| 700      | 7.39×10 <sup>-25</sup> | 2.30×10 <sup>-23</sup> | 4.36×10 <sup>8</sup> | 7.43×10 <sup>-39</sup> | 7.82×10 <sup>-25</sup> | 5.45×10 <sup>-24</sup> | 4.36×10 <sup>8</sup> | 7.43×10 <sup>-39</sup> | 9.54×10 <sup>-25</sup> | 4.46×10 <sup>-24</sup> | 4.36×10 <sup>8</sup> | 7.43×10 <sup>-39</sup> |
| 750      | 7.82×10 <sup>-25</sup> | 1.22×10 <sup>-23</sup> | 7.09×10 <sup>8</sup> | 6.75×10 <sup>-39</sup> | 4.68×10 <sup>-25</sup> | 5.58×10 <sup>-24</sup> | 7.09×10 <sup>8</sup> | 6.75×10 <sup>-39</sup> | 9.27×10 <sup>-25</sup> | 2.82×10 <sup>-24</sup> | 7.09×10 <sup>8</sup> | 6.75×10 <sup>-39</sup> |
| 800      | 8.30×10 <sup>-25</sup> | 7.03×10 <sup>-24</sup> | 1.09×10 <sup>9</sup> | 6.33×10 <sup>-39</sup> | 3.01×10 <sup>-25</sup> | 5.76×10 <sup>-24</sup> | 1.09×10 <sup>9</sup> | 6.33×10 <sup>-39</sup> | 9.13×10 <sup>-25</sup> | 1.90×10 <sup>-24</sup> | 1.09×10 <sup>9</sup> | 6.33×10 <sup>-39</sup> |
| 850      | 8.83×10 <sup>-25</sup> | 4.38×10 <sup>-24</sup> | 1.58×10 <sup>9</sup> | 6.10×10 <sup>-39</sup> | 2.07×10 <sup>-25</sup> | 5.98×10 <sup>-24</sup> | 1.58×10 <sup>9</sup> | 6.10×10 <sup>-39</sup> | 9.09×10 <sup>-25</sup> | 1.36×10 <sup>-24</sup> | 1.58×10 <sup>9</sup> | 6.10×10 <sup>-39</sup> |
| 900      | 9.41×10 <sup>-25</sup> | 2.90×10 <sup>-24</sup> | 2.20×10 <sup>9</sup> | 6.01×10 <sup>-39</sup> | 1.49×10 <sup>-25</sup> | 6.24×10 <sup>-24</sup> | 2.20×10 <sup>9</sup> | 6.01×10 <sup>-39</sup> | 9.12×10 <sup>-25</sup> | 1.02×10 <sup>-24</sup> | 2.20×10 <sup>9</sup> | 6.01×10 <sup>-39</sup> |
| 1000     | 1.07×10 <sup>-24</sup> | 1.47×10 <sup>-24</sup> | 3.89×10 <sup>9</sup> | 6.11×10 <sup>-39</sup> | 8.72×10 <sup>-26</sup> | 6.84×10 <sup>-24</sup> | 3.89×10 <sup>9</sup> | 6.11×10 <sup>-39</sup> | 9.36×10 <sup>-25</sup> | 6.37×10 <sup>-25</sup> | 3.89×10 <sup>9</sup> | 6.11×10 <sup>-39</sup> |





Table S20: Concentrations of  $\text{H}_2\text{O}$  and  $(\text{H}_2\text{O})_2$  in molecules  $\text{cm}^{-3}$ ,  $k_t$  in  $\text{cm}^6 \text{ molecule}^{-2} \text{ sec}^{-1}$  and  $k_{eff}$  in  $\text{cm}^3 \text{ molecule}^{-1} \text{ sec}^{-1}$  at higher altitude.

| Altitude (km) | Temp (K) | $[\text{H}_2\text{O}]$ | $[(\text{H}_2\text{O})_2]$ | $k_t^{WM}$             | $k_t^{WD}$             | $k_{eff}^{WM}$         | $k_{eff}^{WD}$         |
|---------------|----------|------------------------|----------------------------|------------------------|------------------------|------------------------|------------------------|
| 5             | 259      | $2.40 \times 10^{16}$  | $2.70 \times 10^{12}$      | $7.88 \times 10^{-42}$ | $1.06 \times 10^{-35}$ | $5.67 \times 10^{-25}$ | $8.57 \times 10^{-23}$ |
| 10            | 229      | $4.90 \times 10^{15}$  | $2.30 \times 10^{11}$      | $3.67 \times 10^{-42}$ | $3.09 \times 10^{-36}$ | $5.39 \times 10^{-26}$ | $2.13 \times 10^{-24}$ |
| 15            | 212      | $2.00 \times 10^{13}$  | $6.30 \times 10^6$         | $1.63 \times 10^{-42}$ | $8.85 \times 10^{-37}$ | $9.78 \times 10^{-29}$ | $1.67 \times 10^{-29}$ |

Table S21: Absolute energies in Hartree for the uncatalyzed channel optimized at M06-2X/aug-cc-pVTZ level of theory.

| Species              | CCSD(T)/aug-cc-pVDZ | CCSD(T)-aug-cc-pVTZ | CCSD(T)/aug-cc-pVQZ | CCSD(T)-F12/cc-pVTZ |
|----------------------|---------------------|---------------------|---------------------|---------------------|
| CI                   | -189.1688643        | -189.3306171        | -189.3791775        | -189.3927083015     |
| CO                   | -113.0725861        | -113.161723         | -113.1901287        | -113.198651758      |
| TS1 <sub>uncat</sub> | -302.2281981        | -302.4798976        | -302.5563883        | -302.5782708535     |
